# Supplementary material for: At-risk and intervention thresholds of occupational stress using a visual analogue scale
Source: PLoS One. 2017 Jun 6;12(6):e0178948. doi: 10.1371/journal.pone.0178948 (PMC5460813; doi:10.1371/journal.pone.0178948)
Supplement: S1 Database — (XLSX) [file pone.0178948.s001.xlsx]

## Sheet: database
idendifiant	age	sex	occupation	professional_roles	occupational_sectors	education	pss14_item1	pss14_item2	pss14_item3	pss14_item4	pss14_item5	pss14_item6	pss14_item7	pss14_item8	pss14_item9	pss14_item10	pss14_item11	pss14_item12	pss14_item13	pss14_item14	pss14_total	pss14_score_out_of_10	visual_analog_score_of_stress	difference
1	61	male	technician	skilled workers	manufacturing/blue collar industries	bachelor/undergraduate	2	3	3	4	4	4	4	2	4	4	2	4	4	2	32	3.21429	1.3	1.91429
2	57	male	foreman / technician supervisor	mid-level workers	manufacturing/blue collar industries	master degree / postgraduate	1	3	3	3	4	3	3	3	4	3	2	4	3	2	37	4.10714	5	-0.892857
3	45	male	cleaner	unskilled workers	health and social services	high-school diploma (US) / A-level (UK) or less	1	2	1	2	3	3	3	2	3	4	5	5	4	2	38	4.28571	4.1	0.185714
4	39	male	cleaner	unskilled workers	health and social services	high-school diploma (US) / A-level (UK) or less	3	3	4	4	3	4	3	5	3	3	5	3	3	4	46	5.71429	8	-2.28571
5	40	male	cleaner	unskilled workers	health and social services	high-school diploma (US) / A-level (UK) or less	3	3	4	4	4	4	3	3	4	4	2	2	4	2	34	3.57143	2.9	0.671429
6	50	male	technician	skilled workers	building industry	bachelor/undergraduate	1	2	1	4	5	5	4	1	5	4	3	3	3	4	27	2.32143	1.4	0.921429
7	21	male	educator	mid-level workers	health and social services	bachelor/undergraduate	3	2	2	5	4	4	4	3	5	4	3	3	4	2	30	2.85714	3.5	-0.642857
8	38	male	educator	mid-level workers	health and social services	bachelor/undergraduate	3	3	3	4	4	4	3	3	4	3	3	3	4	2	36	3.92857	2.7	1.22857
9	57	male	electromecanician	skilled workers	manufacturing/blue collar industries	high-school diploma (US) / A-level (UK) or less	1	3	4	3	3	4	4	4	3	3	4	3	4	3	40	4.64286	5.3	-0.657143
10	27	male	cook / chef	skilled workers	hospitality workers	high-school diploma (US) / A-level (UK) or less	1	1	1	1	1	5	5	2	5	4	3	4	4	4	33	3.39286	4	-0.607143
11	30	male	driver	unskilled workers	transport workers	high-school diploma (US) / A-level (UK) or less	1	1	2	3	3	3	3	3	4	4	1	3	3	3	33	3.39286	3.8	-0.407143
12	22	male	unskilled workers	unskilled workers	manufacturing/blue collar industries	high-school diploma (US) / A-level (UK) or less	1	3	3	3	5	5	3	1	5	3	1	5	5	1	28	2.5	0	2.5
13	26	male	forklift operator	unskilled workers	agribusiness / food industry	high-school diploma (US) / A-level (UK) or less	3	2	1	3	4	4	3	2	4	4	2	4	3	1	32	3.21429	3	0.214286
14	27	male	sales representative	skilled workers	agribusiness / food industry	bachelor/undergraduate	3	3	3	4	3	4	4	3	5	3	4	3	3	3	38	4.28571	2.1	2.18571
15	38	male	unskilled workers	unskilled workers	manufacturing/blue collar industries	high-school diploma (US) / A-level (UK) or less	1	3	3	3	3	4	3	3	3	3	1	3	3	1	35	3.75	3	0.75
16	38	male	cleaner	unskilled workers	health and social services	high-school diploma (US) / A-level (UK) or less	3	3	4	3	3	4	3	3	4	3	3	3	4	3	40	4.64286	7.1	-2.45714
17	47	male	forklift operator	unskilled workers	agribusiness / food industry	high-school diploma (US) / A-level (UK) or less	2	3	2	4	3	4	4	3	4	5	4	3	3	2	34	3.57143	1.5	2.07143
18	22	male	handler / hand worker	unskilled workers	manufacturing/blue collar industries	high-school diploma (US) / A-level (UK) or less	3	2	2	4	4	4	3	2	4	3	2	3	5	3	32	3.21429	4.5	-1.28571
19	49	male	driver	unskilled workers	transport workers	high-school diploma (US) / A-level (UK) or less	3	2	3	2	1	3	1	3	3	2	5	2	2	5	51	6.60714	9	-2.39286
20	47	male	horticulturist	skilled workers	health and social services	high-school diploma (US) / A-level (UK) or less	3	3	3	4	4	4	3	3	4	4	4	4	4	3	38	4.28571	2.9	1.38571
21	25	male	unskilled workers	unskilled workers	manufacturing/blue collar industries	high-school diploma (US) / A-level (UK) or less	1	1	1	2	3	4	4	1	4	4	1	1	4	1	24	1.78571	1.6	0.185714
22	41	male	unskilled workers	unskilled workers	manufacturing/blue collar industries	high-school diploma (US) / A-level (UK) or less	1	3	3	3	5	3	3	3	3	3	3	5	3	3	40	4.64286	4.2	0.442857
23	40	male	unskilled workers	unskilled workers	manufacturing/blue collar industries	high-school diploma (US) / A-level (UK) or less	1	2	1	3	3	3	4	1	3	4	1	3	5	1	27	2.32143	1.4	0.921429
24	24	male	forklift operator	unskilled workers	agribusiness / food industry	high-school diploma (US) / A-level (UK) or less	1	1	1	3	3	4	3	3	3	3	2	3	4	3	33	3.39286	2.4	0.992857
25	21	male	forklift operator	unskilled workers	agribusiness / food industry	high-school diploma (US) / A-level (UK) or less	1	1	1	3	3	4	4	3	3	4	2	5	5	1	30	2.85714	1.5	1.35714
26	26	male	unskilled workers	unskilled workers	manufacturing/blue collar industries	high-school diploma (US) / A-level (UK) or less	2	4	3	3	4	4	3	2	4	3	3	3	2	2	38	4.28571	2.8	1.48571
27	33	male	cellar master	skilled workers	agribusiness / food industry	high-school diploma (US) / A-level (UK) or less	2	2	2	4	4	4	4	3	4	4	3	3	4	2	31	3.03571	1.1	1.93571
28	33	male	forklift operator	unskilled workers	agribusiness / food industry	high-school diploma (US) / A-level (UK) or less	3	3	3	4	4	4	4	3	4	3	3	3	4	3	36	3.92857	1.9	2.02857
29	19	male	butcher	skilled workers	agribusiness / food industry	high-school diploma (US) / A-level (UK) or less	5	5	5	5	5	4	4	4	5	5	1	4	4	3	37	4.10714	7.3	-3.19286
30	27	male	unskilled workers	unskilled workers	manufacturing/blue collar industries	high-school diploma (US) / A-level (UK) or less	5	1	4	4	5	5	3	3	4	4	4	3	4	2	35	3.75	1.5	2.25
31	21	male	unskilled workers	unskilled workers	manufacturing/blue collar industries	high-school diploma (US) / A-level (UK) or less	3	4	5	2	2	2	2	4	3	2	4	4	3	4	54	7.14286	4.7	2.44286
32	53	male	unskilled workers	unskilled workers	manufacturing/blue collar industries	high-school diploma (US) / A-level (UK) or less	2	3	3	4	4	4	4	4	3	4	3	4	5	3	36	3.92857	5	-1.07143
33	48	male	engineer	senior executives	agribusiness / food industry	master degree / postgraduate	5	4	5	4	4	4	3	4	3	3	5	3	3	4	48	6.07143	4.6	1.47143
34	47	male	technician	skilled workers	health and social services	bachelor/undergraduate	2	2	1	4	4	4	5	3	5	3	3	3	5	2	28	2.5	2.6	-0.1
35	52	male	technician	skilled workers	health and social services	bachelor/undergraduate	4	3	3	4	4	4	3	3	4	3	2	3	3	3	38	4.28571	1.9	2.38571
36	39	male	shift supervisor	mid-level workers	manufacturing/blue collar industries	bachelor/undergraduate	1	1	3	5	5	5	1	1	5	3	3	3	5	1	26	2.14286	1.9	0.242857
37	28	male	forklift operator	unskilled workers	agribusiness / food industry	high-school diploma (US) / A-level (UK) or less	3	3	3	4	3	3	4	3	4	3	2	2	4	2	35	3.75	0.9	2.85
38	29	male	cellar master	skilled workers	agribusiness / food industry	high-school diploma (US) / A-level (UK) or less	3	4	2	4	3	4	3	2	4	3	2	3	4	1	34	3.57143	2.6	0.971429
39	33	male	cleaner	unskilled workers	health and social services	high-school diploma (US) / A-level (UK) or less	3	3	3	2	3	5	4	1	4	3	3	3	5	1	33	3.39286	1.2	2.19286
40	59	male	administrative agent	mid-level workers	health and social services	bachelor/undergraduate	1	1	5	4	3	4	3	4	4	3	3	3	1	1	38	4.28571	5.1	-0.814286
41	43	male	homecare assistant	unskilled workers	health and social services	high-school diploma (US) / A-level (UK) or less	1	3	3	4	3	4	3	4	4	4	3	3	4	2	35	3.75	4	-0.25
42	27	male	unskilled workers	unskilled workers	building industry	high-school diploma (US) / A-level (UK) or less	1	3	3	4	3	5	3	3	5	3	3	5	4	3	36	3.92857	2.5	1.42857
43	25	male	painter	unskilled workers	building industry	high-school diploma (US) / A-level (UK) or less	1	1	4	1	1	5	5	3	4	1	1	1	2	1	35	3.75	3	0.75
44	22	male	unskilled workers	unskilled workers	manufacturing/blue collar industries	high-school diploma (US) / A-level (UK) or less	1	1	1	1	5	5	5	1	5	5	1	4	5	1	21	1.25	0	1.25
45	41	male	unskilled workers	unskilled workers	manufacturing/blue collar industries	high-school diploma (US) / A-level (UK) or less	3	4	4	4	4	4	4	2	4	5	3	3	3	3	36	3.92857	2	1.92857
46	37	male	handler / hand worker	unskilled workers	agribusiness / food industry	high-school diploma (US) / A-level (UK) or less	1	1	2	1	3	4	2	1	1	4	1	4	4	4	37	4.10714	4.6	-0.492857
47	29	male	cook / chef	skilled workers	hospitality workers	high-school diploma (US) / A-level (UK) or less	3	4	5	3	3	3	3	3	4	3	2	3	3	3	43	5.17857	4	1.17857
48	54	male	mecanich	skilled workers	manufacturing/blue collar industries	high-school diploma (US) / A-level (UK) or less	3	2	2	2	5	3	3	4	4	3	1	5	4	2	37	4.10714	2.2	1.90714
49	47	male	storekeeper	unskilled workers	manufacturing/blue collar industries	high-school diploma (US) / A-level (UK) or less	1	1	3	5	5	3	5	1	5	5	1	5	5	1	22	1.42857	0	1.42857
50	21	male	technician	skilled workers	manufacturing/blue collar industries	bachelor/undergraduate	3	3	2	5	4	4	4	3	4	3	2	3	4	1	31	3.03571	1.2	1.83571
51	37	male	forklift operator	unskilled workers	agribusiness / food industry	high-school diploma (US) / A-level (UK) or less	3	2	3	4	3	4	3	2	4	4	3	3	4	2	34	3.57143	6.8	-3.22857
52	20	male	heating specialist	skilled workers	commercial activities and services	high-school diploma (US) / A-level (UK) or less	1	2	2	5	5	5	3	2	5	3	1	3	5	1	23	1.60714	0	1.60714
53	56	male	unskilled workers	unskilled workers	manufacturing/blue collar industries	high-school diploma (US) / A-level (UK) or less	3	3	3	4	4	4	4	2	5	4	3	3	4	2	32	3.21429	2.6	0.614286
54	33	male	technician	skilled workers	commercial activities and services	bachelor/undergraduate	5	3	3	4	4	4	4	4	3	4	3	3	3	3	40	4.64286	2.4	2.24286
55	61	male	director / manager	senior executives	health and social services	master degree / postgraduate	4	3	4	4	3	4	3	2	4	4	3	4	4	2	38	4.28571	4	0.285714
56	49	male	mecanich	skilled workers	manufacturing/blue collar industries	high-school diploma (US) / A-level (UK) or less	3	1	2	5	4	4	4	2	2	4	1	4	4	1	29	2.67857	1	1.67857
57	20	male	unskilled workers	unskilled workers	manufacturing/blue collar industries	high-school diploma (US) / A-level (UK) or less	2	1	2	4	5	5	4	1	5	4	1	4	5	1	22	1.42857	1.7	-0.271429
58	33	male	unskilled workers	unskilled workers	agribusiness / food industry	high-school diploma (US) / A-level (UK) or less	3	4	4	4	3	2	4	5	4	4	3	5	5	3	43	5.17857	7.8	-2.62143
59	35	male	entertainer	mid-level workers	health and social services	bachelor/undergraduate	1	1	3	4	1	5	4	4	4	4	3	3	4	1	32	3.21429	5.2	-1.98571
60	34	male	unskilled workers	unskilled workers	manufacturing/blue collar industries	high-school diploma (US) / A-level (UK) or less	1	3	4	5	3	5	4	3	3	2	4	4	3	3	39	4.46429	4.3	0.164286
61	29	male	electrician	skilled workers	building industry	high-school diploma (US) / A-level (UK) or less	3	4	4	4	4	3	3	4	4	4	4	4	4	2	41	4.82143	5.2	-0.378571
62	41	male	cellar master	skilled workers	agribusiness / food industry	high-school diploma (US) / A-level (UK) or less	4	4	4	4	3	4	3	3	3	4	4	4	4	3	43	5.17857	5.5	-0.321429
63	31	male	cellar master	skilled workers	agribusiness / food industry	high-school diploma (US) / A-level (UK) or less	4	2	3	4	5	4	5	3	4	4	3	4	4	3	34	3.57143	3.5	0.0714286
64	27	male	unskilled workers	unskilled workers	manufacturing/blue collar industries	high-school diploma (US) / A-level (UK) or less	2	1	3	4	4	5	5	2	5	4	2	3	5	1	24	1.78571	2.3	-0.514286
65	32	male	electromecanician	skilled workers	manufacturing/blue collar industries	high-school diploma (US) / A-level (UK) or less	3	2	4	5	5	5	4	3	5	4	3	5	4	2	32	3.21429	2.5	0.714286
66	26	male	unskilled workers	unskilled workers	manufacturing/blue collar industries	high-school diploma (US) / A-level (UK) or less	3	3	2	4	3	4	4	2	5	3	4	4	4	1	34	3.57143	3.2	0.371429
67	33	male	forklift operator	unskilled workers	agribusiness / food industry	high-school diploma (US) / A-level (UK) or less	3	1	2	5	5	4	3	1	5	4	1	3	4	1	24	1.78571	2.3	-0.514286
68	44	male	educator	skilled workers	health and social services	bachelor/undergraduate	2	3	3	3	3	3	3	3	3	3	3	3	3	3	41	4.82143	2.4	2.42143
69	27	male	educator	skilled workers	health and social services	bachelor/undergraduate	1	2	2	2	3	3	3	3	3	3	3	3	3	3	39	4.46429	3	1.46429
70	32	male	entertainer	mid-level workers	health and social services	bachelor/undergraduate	2	1	2	4	4	4	4	2	4	4	2	3	4	1	27	2.32143	1.8	0.521429
71	59	male	administrative agent	mid-level workers	health and social services	bachelor/undergraduate	4	5	5	5	5	5	4	3	4	3	3	5	5	3	39	4.46429	4.5	-0.0357143
72	52	male	driver	unskilled workers	health and social services	high-school diploma (US) / A-level (UK) or less	1	1	1	4	4	3	4	2	4	3	2	2	3	1	27	2.32143	2.9	-0.578571
73	26	male	engineer	senior executives	manufacturing/blue collar industries	master degree / postgraduate	4	3	3	4	4	4	4	1	5	4	3	3	4	1	31	3.03571	3.6	-0.564286
74	49	male	technician	skilled workers	agribusiness / food industry	bachelor/undergraduate	1	1	1	1	5	5	5	1	5	5	1	1	5	1	18	0.714286	0	0.714286
75	28	male	sommelier	skilled workers	hospitality workers	high-school diploma (US) / A-level (UK) or less	1	2	3	5	5	5	4	2	5	5	1	3	5	1	21	1.25	2.7	-1.45
76	55	male	senior manager	senior executives	agribusiness / food industry	master degree / postgraduate	1	2	3	5	5	5	4	3	5	4	2	3	4	2	26	2.14286	5	-2.85714
77	35	male	forklift operator	unskilled workers	building industry	high-school diploma (US) / A-level (UK) or less	4	4	4	5	3	5	3	3	4	3	3	3	3	3	40	4.64286	5.1	-0.457143
78	51	male	driver	unskilled workers	transport workers	high-school diploma (US) / A-level (UK) or less	2	3	3	4	4	4	4	3	4	4	3	3	4	2	33	3.39286	4.1	-0.707143
79	60	male	driver	unskilled workers	transport workers	high-school diploma (US) / A-level (UK) or less	3	3	3	4	4	4	3	3	4	4	2	3	4	2	34	3.57143	5.6	-2.02857
80	44	male	administrative agent	mid-level workers	health and social services	bachelor/undergraduate	5	3	3	4	3	4	4	3	3	3	4	3	3	4	43	5.17857	5	0.178571
81	30	male	administrative agent	mid-level workers	health and social services	bachelor/undergraduate	4	2	1	4	4	4	3	2	4	4	2	3	4	2	31	3.03571	1.2	1.83571
82	57	male	entertainer	mid-level workers	health and social services	bachelor/undergraduate	4	3	3	5	5	5	4	2	5	4	3	5	5	2	31	3.03571	1	2.03571
83	21	male	builder of swimming pools	skilled workers	building industry	high-school diploma (US) / A-level (UK) or less	4	4	4	4	5	5	3	3	3	4	3	4	4	5	41	4.82143	5.4	-0.578571
84	45	male	mecanich	skilled workers	manufacturing/blue collar industries	high-school diploma (US) / A-level (UK) or less	3	3	3	4	4	4	4	2	4	4	2	4	4	1	32	3.21429	1.5	1.71429
85	32	male	unskilled workers	unskilled workers	manufacturing/blue collar industries	high-school diploma (US) / A-level (UK) or less	2	3	4	3	1	5	1	3	3	3	2	3	4	5	44	5.35714	7.1	-1.74286
86	42	male	director / manager	senior executives	agribusiness / food industry	master degree / postgraduate	3	3	4	5	4	4	4	3	4	4	3	4	4	3	36	3.92857	3.5	0.428571
87	56	male	unskilled workers	unskilled workers	manufacturing/blue collar industries	high-school diploma (US) / A-level (UK) or less	3	3	5	4	5	5	3	1	4	3	5	3	4	2	36	3.92857	2.4	1.52857
88	50	male	driver	unskilled workers	transport workers	high-school diploma (US) / A-level (UK) or less	1	3	3	4	5	4	2	3	4	4	3	2	5	2	31	3.03571	3.3	-0.264286
89	58	male	gardener	skilled workers	health and social services	high-school diploma (US) / A-level (UK) or less	3	2	2	4	5	5	5	1	4	4	1	4	4	3	27	2.32143	2.3	0.0214286
90	37	male	director / manager	senior executives	health and social services	master degree / postgraduate	3	2	3	4	4	4	4	2	4	4	2	3	4	2	31	3.03571	6.1	-3.06429
91	53	male	unskilled workers	unskilled workers	manufacturing/blue collar industries	high-school diploma (US) / A-level (UK) or less	2	3	3	4	3	5	3	2	4	4	3	3	4	2	33	3.39286	2.2	1.19286
92	46	male	entertainer	mid-level workers	health and social services	bachelor/undergraduate	5	2	5	3	3	1	4	1	3	3	3	3	1	2	45	5.53571	7.2	-1.66429
93	36	male	driver	unskilled workers	commercial activities and services	high-school diploma (US) / A-level (UK) or less	3	4	5	5	4	4	4	2	3	4	2	3	5	1	33	3.39286	6.8	-3.40714
94	21	male	unskilled workers	unskilled workers	agribusiness / food industry	high-school diploma (US) / A-level (UK) or less	3	5	4	3	4	2	2	3	5	2	4	5	3	4	49	6.25	5.4	0.85
95	18	male	unskilled workers	unskilled workers	agribusiness / food industry	high-school diploma (US) / A-level (UK) or less	1	1	2	3	5	4	5	3	5	3	1	1	5	1	22	1.42857	0.6	0.828571
96	20	male	technician	skilled workers	commercial activities and services	bachelor/undergraduate	2	2	3	5	5	4	5	1	3	4	2	3	4	2	27	2.32143	2	0.321429
97	49	male	unskilled workers	unskilled workers	agribusiness / food industry	high-school diploma (US) / A-level (UK) or less	1	3	3	4	3	4	3	3	5	4	3	3	4	2	33	3.39286	3.2	0.192857
98	34	male	sales representative	skilled workers	transport workers	bachelor/undergraduate	1	3	3	3	3	3	3	3	3	3	3	3	3	3	40	4.64286	5.5	-0.857143
99	40	male	manager	mid-level workers	transport workers	bachelor/undergraduate	5	2	3	5	5	5	5	2	4	4	3	4	4	1	30	2.85714	3.3	-0.442857
100	55	male	driver	unskilled workers	transport workers	high-school diploma (US) / A-level (UK) or less	2	3	4	5	4	4	4	3	4	4	4	3	4	2	34	3.57143	4	-0.428571
101	27	male	forklift operator	unskilled workers	agribusiness / food industry	high-school diploma (US) / A-level (UK) or less	1	3	3	3	2	1	3	3	2	1	3	3	2	1	45	5.53571	6.2	-0.664286
102	50	male	unskilled workers	unskilled workers	health and social services	high-school diploma (US) / A-level (UK) or less	1	1	3	3	2	3	4	5	3	1	3	3	1	1	42	5	3.2	1.8
103	42	male	child minder	skilled workers	health and social services	high-school diploma (US) / A-level (UK) or less	1	3	4	4	4	4	4	3	5	3	3	4	5	2	33	3.39286	4.8	-1.40714
104	56	male	driver	unskilled workers	transport workers	high-school diploma (US) / A-level (UK) or less	1	1	1	5	5	5	5	1	5	5	1	1	5	1	14	0	1.8	-1.8
105	39	male	driver	unskilled workers	transport workers	high-school diploma (US) / A-level (UK) or less	1	2	2	4	4	4	5	1	4	4	2	3	4	1	25	1.96429	1.5	0.464286
106	59	male	engineer	senior executives	commercial activities and services	master degree / postgraduate	3	3	4	3	4	4	2	3	5	2	3	3	4	3	40	4.64286	7.8	-3.15714
107	35	male	informatician	mid-level workers	commercial activities and services	master degree / postgraduate	1	3	4	4	4	4	4	3	4	3	3	3	4	2	34	3.57143	3.7	-0.128571
108	48	male	technician	skilled workers	commercial activities and services	bachelor/undergraduate	2	3	3	3	3	4	4	3	3	4	3	4	4	3	38	4.28571	1.2	3.08571
109	46	male	technician	skilled workers	commercial activities and services	bachelor/undergraduate	4	3	3	3	3	4	3	2	5	5	3	3	4	5	38	4.28571	6.2	-1.91429
110	57	male	senior manager	senior executives	commercial activities and services	master degree / postgraduate	4	3	3	4	4	4	4	3	4	4	3	3	4	3	36	3.92857	4.3	-0.371429
111	37	male	engineer	senior executives	commercial activities and services	master degree / postgraduate	3	2	3	5	5	5	4	2	4	5	3	5	4	3	31	3.03571	6.6	-3.56429
112	48	male	foreman / technician supervisor	mid-level workers	commercial activities and services	master degree / postgraduate	3	2	3	5	5	5	4	2	5	5	3	3	4	2	27	2.32143	2.4	-0.0785714
113	52	male	engineer	senior executives	commercial activities and services	master degree / postgraduate	5	3	1	5	5	5	4	1	5	4	3	5	4	1	29	2.67857	0.9	1.77857
114	28	male	engineer	senior executives	commercial activities and services	master degree / postgraduate	2	2	3	4	4	4	3	1	5	4	2	3	3	1	29	2.67857	3	-0.321429
115	53	male	informatician	mid-level workers	commercial activities and services	master degree / postgraduate	5	3	4	4	5	5	4	3	4	4	3	4	4	3	37	4.10714	6.2	-2.09286
116	29	male	informatician	mid-level workers	commercial activities and services	master degree / postgraduate	2	3	2	5	4	4	4	1	4	5	1	5	4	1	27	2.32143	1.9	0.421429
117	34	male	engineer	senior executives	commercial activities and services	master degree / postgraduate	3	2	2	4	4	4	4	2	4	4	2	4	3	2	32	3.21429	0.9	2.31429
118	54	male	engineer	senior executives	commercial activities and services	master degree / postgraduate	2	3	3	4	4	4	4	2	4	4	3	3	4	2	32	3.21429	4	-0.785714
119	54	male	senior manager	senior executives	commercial activities and services	master degree / postgraduate	3	3	3	3	3	4	3	3	4	3	3	4	3	3	41	4.82143	5.4	-0.578571
120	28	male	engineer	senior executives	commercial activities and services	master degree / postgraduate	3	2	3	4	3	4	3	3	5	4	3	3	4	2	34	3.57143	2.5	1.07143
121	53	male	engineer	senior executives	commercial activities and services	master degree / postgraduate	3	5	5	4	2	2	3	5	4	2	4	4	2	4	53	6.96429	8.7	-1.73571
122	31	male	consultant	mid-level workers	commercial activities and services	master degree / postgraduate	5	3	4	4	3	3	2	3	4	3	2	5	4	3	44	5.35714	6.4	-1.04286
123	32	male	technician	skilled workers	commercial activities and services	bachelor/undergraduate	3	3	3	4	4	4	3	3	4	3	3	3	4	2	36	3.92857	6.7	-2.77143
124	26	male	engineer	senior executives	commercial activities and services	master degree / postgraduate	4	4	3	4	4	4	4	2	4	3	3	4	3	2	38	4.28571	4.7	-0.414286
125	46	male	engineer	senior executives	commercial activities and services	master degree / postgraduate	5	3	3	5	5	5	4	2	4	4	2	4	3	2	33	3.39286	7.5	-4.10714
126	26	male	engineer	senior executives	commercial activities and services	master degree / postgraduate	3	2	3	4	3	4	4	3	4	4	2	5	4	1	34	3.57143	3.3	0.271429
127	43	male	senior manager	senior executives	commercial activities and services	master degree / postgraduate	3	2	3	4	4	3	4	2	5	4	1	3	3	1	30	2.85714	6.1	-3.24286
128	28	male	engineer	senior executives	commercial activities and services	master degree / postgraduate	3	3	4	4	4	4	3	2	4	3	3	5	3	3	40	4.64286	7	-2.35714
129	37	male	engineer	senior executives	commercial activities and services	master degree / postgraduate	5	4	3	3	4	4	4	3	5	4	3	3	3	2	38	4.28571	6.5	-2.21429
130	52	male	marketing	mid-level workers	commercial activities and services	bachelor/undergraduate	4	3	3	4	4	5	5	3	3	4	3	4	4	2	35	3.75	4.6	-0.85
131	29	male	engineer	senior executives	commercial activities and services	master degree / postgraduate	2	3	3	4	4	3	4	2	3	3	3	2	4	2	34	3.57143	1.9	1.67143
132	61	male	senior manager	senior executives	commercial activities and services	master degree / postgraduate	4	3	3	5	5	4	3	3	2	5	3	4	4	1	35	3.75	6.5	-2.75
133	30	male	engineer	senior executives	commercial activities and services	master degree / postgraduate	3	3	3	3	3	4	5	4	3	4	3	4	3	3	40	4.64286	1.9	2.74286
134	33	male	informatician	mid-level workers	commercial activities and services	master degree / postgraduate	3	2	2	4	4	4	4	2	4	4	2	3	4	2	30	2.85714	2.5	0.357143
135	43	male	informatician	mid-level workers	commercial activities and services	master degree / postgraduate	4	2	3	5	4	4	4	2	4	3	3	3	4	3	34	3.57143	3.5	0.0714286
136	36	male	technician	skilled workers	commercial activities and services	bachelor/undergraduate	4	2	3	4	4	4	3	3	3	4	3	2	4	2	35	3.75	6.8	-3.05
137	52	male	technician	skilled workers	commercial activities and services	bachelor/undergraduate	3	2	3	5	3	4	3	3	4	4	3	3	3	2	35	3.75	4.2	-0.45
138	35	male	informatician	mid-level workers	commercial activities and services	master degree / postgraduate	3	3	5	5	5	5	4	3	4	4	3	2	4	3	33	3.39286	5.4	-2.00714
139	27	male	engineer	senior executives	commercial activities and services	master degree / postgraduate	2	3	2	4	2	4	3	2	4	4	2	3	4	2	33	3.39286	1	2.39286
140	49	male	informatician	mid-level workers	commercial activities and services	master degree / postgraduate	3	4	3	4	3	4	3	2	3	4	3	3	4	2	37	4.10714	5.3	-1.19286
141	28	male	engineer	senior executives	commercial activities and services	master degree / postgraduate	3	3	3	4	3	4	4	3	4	3	4	3	4	3	38	4.28571	3	1.28571
142	31	male	informatician	mid-level workers	commercial activities and services	master degree / postgraduate	2	3	4	4	4	4	3	4	3	3	3	2	5	2	36	3.92857	5.8	-1.87143
143	36	male	administrative agent	mid-level workers	commercial activities and services	bachelor/undergraduate	5	3	3	4	4	4	4	2	3	4	3	3	3	2	37	4.10714	6.1	-1.99286
144	26	male	engineer	senior executives	commercial activities and services	master degree / postgraduate	4	3	3	5	4	5	3	2	4	5	3	3	5	2	31	3.03571	4	-0.964286
145	44	male	engineer	senior executives	commercial activities and services	master degree / postgraduate	2	2	3	4	4	5	4	2	3	4	2	4	4	1	30	2.85714	3.7	-0.842857
146	59	male	engineer	senior executives	commercial activities and services	master degree / postgraduate	4	3	4	5	3	4	3	3	4	3	4	3	5	3	39	4.46429	7.9	-3.43571
147	29	male	engineer	senior executives	commercial activities and services	master degree / postgraduate	2	2	3	4	4	4	5	3	4	3	3	4	4	2	33	3.39286	3.2	0.192857
148	45	male	administrative agent	mid-level workers	commercial activities and services	bachelor/undergraduate	5	4	3	5	5	5	4	2	5	5	1	4	5	2	29	2.67857	3	-0.321429
149	51	male	administrative agent	mid-level workers	commercial activities and services	bachelor/undergraduate	4	3	4	4	4	4	4	3	4	4	3	4	4	3	38	4.28571	7	-2.71429
150	28	male	engineer	senior executives	commercial activities and services	master degree / postgraduate	5	3	2	4	4	4	4	3	5	4	1	4	4	1	32	3.21429	3.2	0.0142857
151	54	male	director / manager	senior executives	commercial activities and services	master degree / postgraduate	3	3	3	4	4	4	4	3	4	4	3	4	4	2	35	3.75	6.3	-2.55
152	25	male	engineer	senior executives	commercial activities and services	master degree / postgraduate	2	2	2	4	4	4	4	2	4	4	3	4	4	2	31	3.03571	5.8	-2.76429
153	27	male	engineer	senior executives	commercial activities and services	master degree / postgraduate	3	3	3	4	4	4	4	3	3	4	4	5	4	2	38	4.28571	3.6	0.685714
154	35	male	engineer	senior executives	commercial activities and services	master degree / postgraduate	5	3	3	4	4	4	3	2	4	4	2	3	3	3	37	4.10714	3.7	0.407143
155	28	male	engineer	senior executives	commercial activities and services	master degree / postgraduate	1	1	1	5	5	5	5	1	5	5	1	4	5	1	17	0.535714	0.2	0.335714
156	25	male	technician	skilled workers	commercial activities and services	bachelor/undergraduate	3	1	2	3	4	5	4	2	4	4	2	3	5	1	27	2.32143	2.2	0.121429
157	34	male	informatician	mid-level workers	commercial activities and services	master degree / postgraduate	3	4	3	4	4	4	3	2	4	3	3	1	4	1	33	3.39286	1.1	2.29286
158	47	male	informatician	mid-level workers	commercial activities and services	master degree / postgraduate	2	3	3	4	4	3	4	2	5	4	2	3	4	1	30	2.85714	6.6	-3.74286
159	36	male	engineer	senior executives	commercial activities and services	master degree / postgraduate	2	2	2	4	4	4	4	3	4	3	3	5	3	3	36	3.92857	3.2	0.728571
160	33	male	administrative agent	mid-level workers	commercial activities and services	bachelor/undergraduate	4	3	2	4	5	4	4	2	3	4	3	4	3	2	35	3.75	1.7	2.05
161	46	male	informatician	mid-level workers	commercial activities and services	master degree / postgraduate	3	3	4	5	4	5	4	3	4	4	3	4	3	3	36	3.92857	4.4	-0.471429
162	47	male	engineer	senior executives	commercial activities and services	master degree / postgraduate	4	2	3	5	4	5	3	2	4	3	2	4	3	3	35	3.75	2.7	1.05
163	32	male	engineer	senior executives	commercial activities and services	master degree / postgraduate	4	3	4	3	4	3	4	3	3	3	4	2	3	3	42	5	3.8	1.2
164	58	male	director / manager	senior executives	commercial activities and services	master degree / postgraduate	5	4	2	5	4	4	4	2	5	5	3	2	5	2	30	2.85714	2.1	0.757143
165	52	male	technician	skilled workers	commercial activities and services	bachelor/undergraduate	3	3	4	5	4	4	3	4	5	4	3	4	4	2	36	3.92857	6.2	-2.27143
166	51	male	engineer	senior executives	commercial activities and services	master degree / postgraduate	4	5	5	3	3	3	2	4	4	3	4	4	3	5	52	6.78571	10	-3.21429
167	28	male	accountant	mid-level workers	commercial activities and services	bachelor/undergraduate	5	4	4	4	3	3	3	3	2	2	5	4	3	4	51	6.60714	8.2	-1.59286
168	48	male	engineer	senior executives	commercial activities and services	master degree / postgraduate	3	3	4	5	4	4	4	3	3	4	3	4	4	4	38	4.28571	7.9	-3.61429
169	52	male	engineer	senior executives	commercial activities and services	master degree / postgraduate	2	3	3	4	3	4	4	4	4	4	3	4	4	1	35	3.75	4	-0.25
170	31	male	engineer	senior executives	commercial activities and services	master degree / postgraduate	3	3	4	3	3	4	3	5	3	3	5	5	4	3	47	5.89286	4.9	0.992857
171	43	male	engineer	senior executives	commercial activities and services	master degree / postgraduate	1	1	2	5	1	5	5	1	5	5	1	5	5	1	23	1.60714	3.1	-1.49286
172	51	male	informatician	mid-level workers	commercial activities and services	master degree / postgraduate	4	3	4	3	3	3	3	3	3	3	4	4	3	3	46	5.71429	4.7	1.01429
173	58	male	informatician	mid-level workers	commercial activities and services	master degree / postgraduate	4	3	4	4	3	4	3	3	4	3	3	3	4	2	39	4.46429	5.1	-0.635714
174	50	male	informatician	mid-level workers	commercial activities and services	master degree / postgraduate	2	3	3	3	3	4	2	2	4	3	2	3	3	2	37	4.10714	5	-0.892857
175	58	male	engineer	senior executives	commercial activities and services	master degree / postgraduate	5	3	4	4	4	4	3	3	4	4	3	3	4	3	39	4.46429	6.3	-1.83571
176	37	male	informatician	mid-level workers	commercial activities and services	master degree / postgraduate	2	2	2	5	5	5	4	2	5	5	1	3	5	1	21	1.25	2.4	-1.15
177	35	male	administrative agent	mid-level workers	commercial activities and services	bachelor/undergraduate	2	3	2	4	4	4	3	3	4	4	2	3	4	3	33	3.39286	2.6	0.792857
178	50	male	engineer	senior executives	commercial activities and services	master degree / postgraduate	3	2	3	4	4	4	4	2	4	4	2	4	4	2	32	3.21429	4.6	-1.38571
179	29	male	engineer	senior executives	commercial activities and services	master degree / postgraduate	2	1	3	4	4	5	5	2	3	4	2	3	5	1	26	2.14286	6.4	-4.25714
180	39	male	technician	skilled workers	commercial activities and services	bachelor/undergraduate	3	3	3	4	4	4	3	2	3	3	3	4	4	3	38	4.28571	2.3	1.98571
181	26	male	engineer	senior executives	commercial activities and services	master degree / postgraduate	2	2	3	4	4	3	4	4	2	4	2	3	3	1	35	3.75	2.8	0.95
182	47	male	informatician	mid-level workers	commercial activities and services	master degree / postgraduate	4	3	3	4	4	4	4	3	4	4	3	3	4	2	35	3.75	4.5	-0.75
183	43	male	engineer	senior executives	commercial activities and services	master degree / postgraduate	5	4	5	2	3	2	3	3	5	3	3	5	2	4	51	6.60714	8.1	-1.49286
184	37	male	engineer	senior executives	commercial activities and services	master degree / postgraduate	4	3	3	3	4	4	4	3	3	4	3	3	3	3	39	4.46429	6.9	-2.43571
185	36	male	engineer	senior executives	commercial activities and services	master degree / postgraduate	4	3	4	3	4	5	5	1	4	4	3	4	4	1	33	3.39286	4.3	-0.907143
186	46	male	informatician	mid-level workers	commercial activities and services	master degree / postgraduate	2	5	5	3	2	2	1	5	2	2	5	1	2	5	56	7.5	7.4	0.1
187	55	male	consultant	mid-level workers	commercial activities and services	master degree / postgraduate	3	3	4	5	5	5	4	3	5	4	3	4	5	3	32	3.21429	6.8	-3.58571
188	25	male	senior manager	senior executives	commercial activities and services	master degree / postgraduate	2	3	5	5	5	4	4	4	5	5	4	5	5	4	36	3.92857	3.5	0.428571
189	43	male	forklift operator	unskilled workers	manufacturing/blue collar industries	high-school diploma (US) / A-level (UK) or less	1	3	2	3	4	5	4	1	4	5	3	4	5	1	27	2.32143	0	2.32143
190	45	male	senior manager	senior executives	health and social services	master degree / postgraduate	4	2	3	5	5	5	5	2	5	5	3	4	5	2	27	2.32143	2.5	-0.178571
191	44	male	educator	skilled workers	health and social services	bachelor/undergraduate	2	3	4	3	3	3	2	4	3	2	4	4	3	4	48	6.07143	5.5	0.571429
192	50	male	unskilled workers	unskilled workers	manufacturing/blue collar industries	high-school diploma (US) / A-level (UK) or less	1	3	3	4	3	4	4	4	4	3	3	3	4	2	35	3.75	0.5	3.25
193	34	male	technician	skilled workers	manufacturing/blue collar industries	bachelor/undergraduate	5	3	5	4	3	4	3	3	4	4	5	5	4	4	46	5.71429	7.5	-1.78571
194	21	male	unskilled workers	unskilled workers	manufacturing/blue collar industries	high-school diploma (US) / A-level (UK) or less	2	3	4	4	3	4	4	4	3	3	4	3	3	1	39	4.46429	5.5	-1.03571
195	61	male	unskilled workers	unskilled workers	manufacturing/blue collar industries	high-school diploma (US) / A-level (UK) or less	1	2	3	4	5	4	3	3	5	3	3	4	5	3	32	3.21429	4	-0.785714
196	59	male	sales representative	skilled workers	manufacturing/blue collar industries	bachelor/undergraduate	3	2	2	4	4	5	4	2	4	4	2	4	4	2	30	2.85714	4	-1.14286
197	39	male	sales representative	skilled workers	manufacturing/blue collar industries	bachelor/undergraduate	3	2	2	3	2	4	3	3	4	3	3	3	3	3	39	4.46429	2	2.46429
198	47	male	sales representative	skilled workers	manufacturing/blue collar industries	bachelor/undergraduate	2	3	4	4	4	4	4	3	3	3	3	5	3	2	39	4.46429	5	-0.535714
199	67	male	engineer	senior executives	health and social services	master degree / postgraduate	3	3	2	4	5	5	4	3	4	4	3	4	4	2	32	3.21429	1.5	1.71429
200	35	male	educator	skilled workers	health and social services	bachelor/undergraduate	1	1	2	5	5	5	5	1	5	5	1	5	5	1	19	0.892857	0.5	0.392857
201	54	male	dressmaker	skilled workers	manufacturing/blue collar industries	high-school diploma (US) / A-level (UK) or less	1	2	3	5	5	4	3	2	4	4	3	2	4	2	28	2.5	3	-0.5
202	28	male	engineer	senior executives	manufacturing/blue collar industries	master degree / postgraduate	3	3	4	4	3	5	4	2	5	4	3	3	3	2	34	3.57143	1	2.57143
203	32	male	engineer	senior executives	manufacturing/blue collar industries	master degree / postgraduate	3	3	3	4	3	4	3	3	5	3	3	4	4	3	38	4.28571	5	-0.714286
204	30	male	shift supervisor	mid-level workers	manufacturing/blue collar industries	bachelor/undergraduate	3	2	3	4	4	5	4	1	3	4	3	5	4	1	32	3.21429	3.5	-0.285714
205	51	male	unskilled workers	unskilled workers	manufacturing/blue collar industries	high-school diploma (US) / A-level (UK) or less	3	4	5	3	3	5	3	5	5	5	3	3	5	3	39	4.46429	4.5	-0.0357143
206	29	male	designer	skilled workers	manufacturing/blue collar industries	bachelor/undergraduate	3	3	3	4	4	4	3	3	4	3	3	4	4	3	38	4.28571	1.5	2.78571
207	55	male	mecanich	skilled workers	manufacturing/blue collar industries	high-school diploma (US) / A-level (UK) or less	2	2	2	4	5	4	3	3	4	4	3	3	4	2	31	3.03571	0	3.03571
208	30	male	driver	unskilled workers	manufacturing/blue collar industries	high-school diploma (US) / A-level (UK) or less	2	2	2	4	5	4	4	3	4	3	2	3	3	2	31	3.03571	2.5	0.535714
209	44	male	informatician	mid-level workers	manufacturing/blue collar industries	master degree / postgraduate	2	2	3	4	4	4	4	2	4	4	2	3	4	2	30	2.85714	5	-2.14286
210	33	male	unskilled workers	unskilled workers	manufacturing/blue collar industries	high-school diploma (US) / A-level (UK) or less	1	1	1	1	5	3	4	1	5	4	1	1	5	1	22	1.42857	0	1.42857
211	46	male	storekeeper	unskilled workers	manufacturing/blue collar industries	high-school diploma (US) / A-level (UK) or less	4	3	5	5	5	5	1	3	5	3	3	5	4	3	40	4.64286	2	2.64286
212	57	male	storekeeper	unskilled workers	manufacturing/blue collar industries	high-school diploma (US) / A-level (UK) or less	3	1	5	3	3	5	3	5	5	5	5	5	2	4	44	5.35714	10	-4.64286
213	43	male	storekeeper	unskilled workers	manufacturing/blue collar industries	high-school diploma (US) / A-level (UK) or less	3	3	4	5	4	4	4	2	4	4	3	3	4	3	34	3.57143	3.5	0.0714286
214	47	male	handler / hand worker	unskilled workers	manufacturing/blue collar industries	high-school diploma (US) / A-level (UK) or less	3	2	2	3	3	3	5	2	5	5	2	3	3	1	30	2.85714	2	0.857143
215	45	male	technician	skilled workers	manufacturing/blue collar industries	bachelor/undergraduate	3	3	3	3	3	4	3	2	5	4	3	3	5	2	34	3.57143	0.5	3.07143
216	32	male	painter	unskilled workers	manufacturing/blue collar industries	high-school diploma (US) / A-level (UK) or less	3	2	3	3	3	3	3	3	4	3	3	4	5	2	38	4.28571	7	-2.71429
217	33	male	metal skilled worker	skilled workers	manufacturing/blue collar industries	high-school diploma (US) / A-level (UK) or less	3	3	3	3	5	5	4	2	4	4	2	2	4	2	30	2.85714	0	2.85714
218	40	male	metal skilled worker	skilled workers	manufacturing/blue collar industries	high-school diploma (US) / A-level (UK) or less	3	3	3	2	2	3	2	3	3	3	3	3	4	2	43	5.17857	0	5.17857
219	28	male	designer	skilled workers	manufacturing/blue collar industries	bachelor/undergraduate	2	3	2	5	5	5	4	2	4	4	3	4	4	3	30	2.85714	2.5	0.357143
220	22	male	unskilled workers	unskilled workers	agribusiness / food industry	high-school diploma (US) / A-level (UK) or less	3	2	3	4	4	4	3	2	3	4	1	1	3	1	30	2.85714	3	-0.142857
221	24	male	unskilled workers	unskilled workers	agribusiness / food industry	high-school diploma (US) / A-level (UK) or less	3	3	4	4	4	5	3	3	4	4	2	5	4	1	35	3.75	2.5	1.25
222	35	male	sales representative	skilled workers	agribusiness / food industry	bachelor/undergraduate	4	2	3	4	4	4	4	3	4	4	2	4	4	2	34	3.57143	4	-0.428571
223	25	male	unskilled workers	unskilled workers	building industry	high-school diploma (US) / A-level (UK) or less	4	2	2	4	4	5	4	2	4	4	3	3	4	2	31	3.03571	2	1.03571
224	35	male	storekeeper	unskilled workers	manufacturing/blue collar industries	high-school diploma (US) / A-level (UK) or less	2	3	4	4	4	4	3	3	4	3	3	5	4	2	38	4.28571	2.5	1.78571
225	58	male	sales representative	skilled workers	agribusiness / food industry	bachelor/undergraduate	4	2	4	5	1	4	4	3	3	4	4	3	5	2	38	4.28571	7.5	-3.21429
226	23	male	forklift operator	unskilled workers	agribusiness / food industry	high-school diploma (US) / A-level (UK) or less	4	3	4	5	3	2	3	4	4	3	2	3	4	3	41	4.82143	2	2.82143
227	29	male	cloth buyer	skilled workers	manufacturing/blue collar industries	bachelor/undergraduate	2	2	3	4	3	4	4	2	4	4	2	3	4	3	32	3.21429	2.5	0.714286
228	43	male	sales representative	skilled workers	building industry	bachelor/undergraduate	1	2	4	3	3	4	3	3	3	3	3	3	3	2	38	4.28571	4.5	-0.214286
229	27	male	forklift operator	unskilled workers	building industry	high-school diploma (US) / A-level (UK) or less	2	3	3	4	4	4	3	3	3	3	3	4	2	2	39	4.46429	2.5	1.96429
230	40	male	unskilled workers	unskilled workers	building industry	high-school diploma (US) / A-level (UK) or less	2	5	5	4	4	5	5	5	5	5	3	3	3	5	39	4.46429	7.5	-3.03571
231	50	male	shift supervisor	mid-level workers	manufacturing/blue collar industries	bachelor/undergraduate	3	2	2	5	5	5	4	3	4	4	3	3	3	1	29	2.67857	2	0.678571
232	30	male	unskilled workers	unskilled workers	manufacturing/blue collar industries	high-school diploma (US) / A-level (UK) or less	5	3	3	4	4	4	3	3	4	4	3	4	4	3	39	4.46429	5	-0.535714
233	50	male	shift supervisor	mid-level workers	manufacturing/blue collar industries	bachelor/undergraduate	3	3	3	4	5	4	4	3	3	3	3	3	3	3	37	4.10714	1.5	2.60714
234	49	male	shift supervisor	mid-level workers	manufacturing/blue collar industries	bachelor/undergraduate	3	2	5	4	3	4	3	3	4	3	3	5	5	1	38	4.28571	5	-0.714286
235	22	male	unskilled workers	unskilled workers	manufacturing/blue collar industries	high-school diploma (US) / A-level (UK) or less	3	3	4	3	4	3	2	3	3	3	3	3	4	3	42	5	5	0
236	37	male	unskilled workers	unskilled workers	manufacturing/blue collar industries	high-school diploma (US) / A-level (UK) or less	3	4	1	5	4	5	3	3	4	4	3	4	4	2	33	3.39286	0	3.39286
237	49	male	unskilled workers	unskilled workers	manufacturing/blue collar industries	high-school diploma (US) / A-level (UK) or less	3	3	5	3	4	5	4	4	4	3	4	4	3	3	42	5	7.5	-2.5
238	27	male	unskilled workers	unskilled workers	manufacturing/blue collar industries	high-school diploma (US) / A-level (UK) or less	2	2	3	3	3	4	5	3	4	4	1	4	4	2	32	3.21429	3.5	-0.285714
239	25	male	shift supervisor	mid-level workers	manufacturing/blue collar industries	bachelor/undergraduate	2	1	2	4	3	5	5	1	5	5	1	1	5	1	19	0.892857	0	0.892857
240	20	male	educator	skilled workers	health and social services	bachelor/undergraduate	3	3	2	4	4	4	4	2	4	5	3	4	3	1	32	3.21429	4	-0.785714
241	47	male	storekeeper	unskilled workers	commercial activities and services	high-school diploma (US) / A-level (UK) or less	4	4	3	3	3	4	3	3	3	3	3	3	3	3	43	5.17857	5	0.178571
242	45	male	marketing	mid-level workers	agribusiness / food industry	bachelor/undergraduate	4	3	4	3	3	4	3	2	3	3	3	4	4	2	41	4.82143	7	-2.17857
243	34	male	storekeeper	unskilled workers	commercial activities and services	high-school diploma (US) / A-level (UK) or less	1	1	1	2	5	5	5	1	4	5	1	2	5	3	21	1.25	0	1.25
244	56	male	storekeeper	unskilled workers	commercial activities and services	high-school diploma (US) / A-level (UK) or less	2	3	4	5	4	4	5	3	5	3	3	2	5	2	30	2.85714	0	2.85714
245	35	male	technician	skilled workers	health and social services	bachelor/undergraduate	3	3	4	5	3	4	3	3	3	3	3	3	3	5	42	5	6	-1
246	53	male	night watchman	unskilled workers	health and social services	high-school diploma (US) / A-level (UK) or less	3	1	3	3	3	3	3	2	5	4	3	3	3	1	34	3.57143	0	3.57143
247	48	male	entertainer	mid-level workers	health and social services	bachelor/undergraduate	5	3	3	4	4	5	4	1	5	4	3	4	4	2	33	3.39286	4	-0.607143
248	25	male	technician	skilled workers	commercial activities and services	bachelor/undergraduate	3	3	3	5	4	3	3	3	4	3	4	3	3	2	38	4.28571	2.5	1.78571
249	51	female	administrative agent	mid-level workers	health and social services	bachelor/undergraduate	5	3	4	4	4	4	3	3	4	3	3	5	4	4	43	5.17857	3.5	1.67857
250	37	female	educator	skilled workers	health and social services	bachelor/undergraduate	3	4	5	5	4	4	3	3	3	3	4	4	2	3	44	5.35714	7.3	-1.94286
251	39	female	project manager	mid-level workers	health and social services	bachelor/undergraduate	4	2	4	5	5	5	3	2	3	5	3	1	5	1	28	2.5	5	-2.5
252	34	female	administrative agent	mid-level workers	health and social services	bachelor/undergraduate	4	3	4	4	3	3	4	4	4	3	3	5	2	3	45	5.53571	2.7	2.83571
253	41	female	administrative agent	mid-level workers	health and social services	bachelor/undergraduate	5	5	5	2	2	1	1	4	2	2	5	3	3	5	61	8.39286	10	-1.60714
254	51	female	cleaner	unskilled workers	health and social services	high-school diploma (US) / A-level (UK) or less	1	1	3	3	4	5	3	1	4	3	3	3	5	1	28	2.5	4.7	-2.2
255	53	female	administrative agent	mid-level workers	health and social services	bachelor/undergraduate	1	3	3	5	3	5	3	3	5	3	3	3	5	1	30	2.85714	4.9	-2.04286
256	54	female	administrative agent	mid-level workers	health and social services	bachelor/undergraduate	4	3	3	5	4	4	3	3	4	4	3	2	5	1	32	3.21429	3.2	0.0142857
257	24	female	unskilled workers	unskilled workers	manufacturing/blue collar industries	high-school diploma (US) / A-level (UK) or less	1	1	3	5	5	5	5	2	5	4	2	3	5	1	21	1.25	2.4	-1.15
258	50	female	unskilled workers	unskilled workers	manufacturing/blue collar industries	high-school diploma (US) / A-level (UK) or less	3	4	3	3	3	3	2	2	5	2	5	4	4	5	46	5.71429	4.8	0.914286
259	33	female	police officer	mid-level workers	health and social services	bachelor/undergraduate	4	5	5	5	3	2	1	5	2	2	4	5	3	5	57	7.67857	10	-2.32143
260	38	female	cleaner	unskilled workers	health and social services	high-school diploma (US) / A-level (UK) or less	3	3	3	3	3	3	3	3	2	1	1	2	2	2	42	5	10	-5
261	53	female	technician	skilled workers	health and social services	bachelor/undergraduate	3	3	4	3	3	4	3	3	3	3	4	4	4	3	43	5.17857	6.5	-1.32143
262	47	female	cleaner	unskilled workers	health and social services	high-school diploma (US) / A-level (UK) or less	5	3	5	3	5	3	2	4	4	4	2	4	3	5	46	5.71429	8.5	-2.78571
263	59	female	administrative agent	mid-level workers	health and social services	bachelor/undergraduate	3	3	4	5	4	4	3	3	4	4	3	4	5	2	35	3.75	4.2	-0.45
264	39	female	sales representative	skilled workers	agribusiness / food industry	bachelor/undergraduate	3	2	2	5	4	4	4	2	4	4	2	3	4	2	29	2.67857	3.1	-0.421429
265	39	female	unskilled workers	unskilled workers	manufacturing/blue collar industries	high-school diploma (US) / A-level (UK) or less	1	1	2	5	5	5	4	2	5	3	3	3	5	2	24	1.78571	3.4	-1.61429
266	50	female	unskilled workers	unskilled workers	manufacturing/blue collar industries	high-school diploma (US) / A-level (UK) or less	4	4	5	3	3	3	3	5	2	1	3	5	2	5	56	7.5	10	-2.5
267	31	female	unskilled workers	unskilled workers	manufacturing/blue collar industries	high-school diploma (US) / A-level (UK) or less	4	3	5	3	3	3	2	4	3	3	3	3	3	4	48	6.07143	7.1	-1.02857
268	35	female	unskilled workers	unskilled workers	manufacturing/blue collar industries	high-school diploma (US) / A-level (UK) or less	1	3	5	3	3	2	1	5	3	1	4	4	3	4	52	6.78571	5	1.78571
269	51	female	child minder	skilled workers	health and social services	high-school diploma (US) / A-level (UK) or less	1	5	5	3	3	4	3	4	4	4	4	4	3	5	46	5.71429	6.9	-1.18571
270	43	female	administrative agent	mid-level workers	health and social services	bachelor/undergraduate	3	2	3	4	4	4	3	3	4	4	3	3	4	1	33	3.39286	4.7	-1.30714
271	33	female	child nurse	mid-level workers	health and social services	bachelor/undergraduate	4	2	3	5	4	5	4	2	5	5	2	4	5	1	27	2.32143	1.3	1.02143
272	46	female	administrative agent	mid-level workers	health and social services	bachelor/undergraduate	4	2	3	5	5	5	5	4	4	5	2	3	5	1	27	2.32143	1.5	0.821429
273	59	female	administrative agent	mid-level workers	health and social services	bachelor/undergraduate	3	2	3	4	4	5	4	1	3	4	2	4	4	1	30	2.85714	3.5	-0.642857
274	53	female	cleaner	unskilled workers	manufacturing/blue collar industries	high-school diploma (US) / A-level (UK) or less	1	3	3	3	4	4	4	3	4	4	3	2	5	1	30	2.85714	0.6	2.25714
275	47	female	cellar master	skilled workers	agribusiness / food industry	high-school diploma (US) / A-level (UK) or less	3	2	2	4	4	4	3	3	4	3	2	3	3	1	33	3.39286	3.2	0.192857
276	31	female	unskilled workers	unskilled workers	manufacturing/blue collar industries	high-school diploma (US) / A-level (UK) or less	1	2	3	5	5	4	5	1	5	5	3	3	5	1	22	1.42857	0	1.42857
277	22	female	unskilled workers	unskilled workers	manufacturing/blue collar industries	high-school diploma (US) / A-level (UK) or less	3	3	5	4	4	4	3	2	3	3	3	3	3	2	39	4.46429	7.3	-2.83571
278	25	female	handler / hand worker	unskilled workers	health and social services	high-school diploma (US) / A-level (UK) or less	1	1	1	3	4	4	5	1	3	3	2	3	3	3	29	2.67857	0.4	2.27857
279	39	female	unskilled workers	unskilled workers	health and social services	high-school diploma (US) / A-level (UK) or less	4	3	4	2	3	4	2	3	4	3	3	4	5	3	43	5.17857	8	-2.82143
280	45	female	administrative agent	mid-level workers	health and social services	bachelor/undergraduate	1	3	4	5	5	5	3	3	5	5	5	5	5	1	31	3.03571	6.2	-3.16429
281	48	female	cleaner	unskilled workers	health and social services	high-school diploma (US) / A-level (UK) or less	3	3	4	3	3	3	3	3	3	3	3	3	3	3	43	5.17857	7.2	-2.02143
282	30	female	forklift operator	unskilled workers	agribusiness / food industry	high-school diploma (US) / A-level (UK) or less	3	2	3	3	4	5	5	2	4	3	2	3	5	2	30	2.85714	2.7	0.157143
283	30	female	unskilled workers	unskilled workers	manufacturing/blue collar industries	high-school diploma (US) / A-level (UK) or less	2	3	3	4	3	2	4	4	4	3	3	4	4	4	41	4.82143	4	0.821429
284	43	female	administrative agent	mid-level workers	health and social services	bachelor/undergraduate	4	5	5	3	2	3	2	4	3	3	4	5	3	4	54	7.14286	7.9	-0.757143
285	58	female	administrative agent	mid-level workers	health and social services	bachelor/undergraduate	2	3	3	5	3	4	4	3	4	4	4	4	4	2	35	3.75	5.6	-1.85
286	34	female	forklift operator	unskilled workers	agribusiness / food industry	high-school diploma (US) / A-level (UK) or less	1	1	1	5	5	5	5	1	1	5	1	5	5	1	22	1.42857	0	1.42857
287	32	female	administrative agent	mid-level workers	agribusiness / food industry	bachelor/undergraduate	3	3	3	3	4	4	3	3	3	3	3	3	4	3	39	4.46429	5	-0.535714
288	30	female	engineer	senior executives	agribusiness / food industry	master degree / postgraduate	2	3	3	5	3	3	3	2	4	4	2	5	4	1	34	3.57143	1.9	1.67143
289	28	female	child minder	skilled workers	health and social services	high-school diploma (US) / A-level (UK) or less	1	1	3	5	4	5	5	3	5	4	2	1	5	1	21	1.25	0	1.25
290	57	female	cleaner	unskilled workers	health and social services	high-school diploma (US) / A-level (UK) or less	4	5	5	5	5	5	1	4	4	5	5	5	5	1	41	4.82143	4.5	0.321429
291	53	female	educator	skilled workers	health and social services	bachelor/undergraduate	3	1	3	4	4	4	3	2	4	4	2	4	4	1	31	3.03571	4.6	-1.56429
292	34	female	administrative agent	mid-level workers	agribusiness / food industry	bachelor/undergraduate	2	2	3	4	4	4	4	2	4	3	2	4	4	1	31	3.03571	2.1	0.935714
293	51	female	manager	mid-level workers	agribusiness / food industry	bachelor/undergraduate	3	3	3	5	4	3	3	3	4	4	3	5	3	3	39	4.46429	5.3	-0.835714
294	40	female	educator	skilled workers	health and social services	bachelor/undergraduate	3	2	3	4	5	4	4	2	4	4	3	4	5	2	31	3.03571	3.4	-0.364286
295	47	female	manager	mid-level workers	health and social services	bachelor/undergraduate	5	3	5	4	4	4	4	3	4	4	3	5	4	3	41	4.82143	6.5	-1.67857
296	38	female	cleaner	unskilled workers	health and social services	bachelor/undergraduate	1	2	3	4	4	4	4	4	5	4	1	2	5	2	27	2.32143	0	2.32143
297	26	female	technician	skilled workers	health and social services	bachelor/undergraduate	5	5	5	4	1	2	1	3	3	3	5	3	2	5	57	7.67857	8.2	-0.521429
298	54	female	administrative agent	mid-level workers	health and social services	bachelor/undergraduate	4	3	3	4	4	3	4	3	3	4	5	5	3	3	43	5.17857	4.5	0.678571
299	44	female	home help	unskilled workers	health and social services	high-school diploma (US) / A-level (UK) or less	4	3	5	3	3	3	3	3	4	4	2	4	4	3	42	5	8.5	-3.5
300	37	female	child minder	skilled workers	health and social services	high-school diploma (US) / A-level (UK) or less	1	1	4	4	4	4	5	1	3	5	3	3	3	2	29	2.67857	6	-3.32143
301	29	female	manager	mid-level workers	agribusiness / food industry	bachelor/undergraduate	3	2	2	4	4	4	4	2	4	4	2	2	4	2	29	2.67857	1.6	1.07857
302	33	female	handler / hand worker	unskilled workers	manufacturing/blue collar industries	high-school diploma (US) / A-level (UK) or less	2	1	3	5	5	3	3	3	3	1	1	2	5	1	30	2.85714	2.5	0.357143
303	33	female	unskilled workers	unskilled workers	manufacturing/blue collar industries	high-school diploma (US) / A-level (UK) or less	1	3	3	5	5	5	3	1	5	4	1	3	3	2	26	2.14286	2.4	-0.257143
304	23	female	senior manager	senior executives	agribusiness / food industry	master degree / postgraduate	5	3	4	4	4	4	3	3	5	3	4	4	4	3	41	4.82143	7.8	-2.97857
305	28	female	homecare assistant	unskilled workers	health and social services	high-school diploma (US) / A-level (UK) or less	4	3	3	5	5	5	4	4	3	4	3	4	4	1	34	3.57143	3	0.571429
306	34	female	cleaner	unskilled workers	health and social services	bachelor/undergraduate	3	3	4	4	4	4	3	3	4	3	3	3	4	3	38	4.28571	6.8	-2.51429
307	53	female	head manager	senior executives	agribusiness / food industry	master degree / postgraduate	5	4	5	5	5	4	4	4	4	4	3	4	3	3	41	4.82143	5.9	-1.07857
308	34	female	forklift operator	unskilled workers	agribusiness / food industry	high-school diploma (US) / A-level (UK) or less	1	3	2	3	3	4	3	2	5	5	1	3	5	3	29	2.67857	2.3	0.378571
309	53	female	cleaner	unskilled workers	health and social services	bachelor/undergraduate	2	3	3	4	4	4	4	3	4	3	3	4	4	3	36	3.92857	2	1.92857
310	44	female	night watchman	unskilled workers	health and social services	high-school diploma (US) / A-level (UK) or less	3	2	3	4	5	5	5	3	3	4	3	3	5	2	30	2.85714	2.2	0.657143
311	57	female	administrative agent	mid-level workers	health and social services	bachelor/undergraduate	4	2	3	4	5	5	4	2	3	4	3	4	4	2	33	3.39286	3	0.392857
312	61	female	psychomotor therapist	mid-level workers	health and social services	bachelor/undergraduate	3	3	3	3	4	4	4	3	3	3	3	3	4	2	37	4.10714	5.7	-1.59286
313	29	female	educator	skilled workers	health and social services	bachelor/undergraduate	3	3	4	4	4	3	3	3	4	3	3	3	3	3	40	4.64286	5	-0.357143
314	40	female	cashier	unskilled workers	commercial activities and services	high-school diploma (US) / A-level (UK) or less	3	2	3	3	3	4	1	2	3	4	3	4	4	5	42	5	6.5	-1.5
315	47	female	homecare assistant	unskilled workers	health and social services	high-school diploma (US) / A-level (UK) or less	4	4	5	5	3	4	2	3	5	4	4	4	5	5	43	5.17857	8	-2.82143
316	50	female	administrative agent	mid-level workers	health and social services	bachelor/undergraduate	2	1	1	5	5	5	4	1	5	5	1	1	5	1	16	0.357143	0.2	0.157143
317	27	female	educator	skilled workers	health and social services	bachelor/undergraduate	3	3	4	4	3	4	4	3	3	3	3	4	4	3	40	4.64286	5	-0.357143
318	29	female	entertainer	mid-level workers	health and social services	bachelor/undergraduate	3	4	5	4	5	4	3	1	4	3	3	2	3	2	36	3.92857	5.7	-1.77143
319	39	female	administrative agent	mid-level workers	health and social services	bachelor/undergraduate	4	4	5	4	3	4	4	3	3	3	4	4	3	3	45	5.53571	5.8	-0.264286
320	34	female	administrative agent	mid-level workers	health and social services	bachelor/undergraduate	4	1	3	5	5	5	4	3	4	4	2	5	5	1	29	2.67857	3.2	-0.521429
321	36	female	administrative agent	mid-level workers	health and social services	bachelor/undergraduate	3	2	4	4	4	4	4	2	3	3	3	3	4	2	35	3.75	4	-0.25
322	58	female	cultural assistant	skilled workers	health and social services	bachelor/undergraduate	2	1	3	4	4	5	4	2	4	3	3	4	5	2	30	2.85714	3	-0.142857
323	39	female	administrative agent	mid-level workers	health and social services	bachelor/undergraduate	2	2	2	5	5	4	4	2	5	4	2	4	4	2	27	2.32143	2.5	-0.178571
324	53	female	administrative agent	mid-level workers	health and social services	bachelor/undergraduate	3	3	3	5	4	5	3	3	4	3	1	3	3	2	33	3.39286	5.8	-2.40714
325	54	female	administrative agent	mid-level workers	health and social services	bachelor/undergraduate	1	1	3	3	4	4	4	1	4	4	3	4	5	3	30	2.85714	4.9	-2.04286
326	26	female	veterinarian	senior executives	health and social services	master degree / postgraduate	2	1	3	5	5	5	5	2	5	5	2	4	4	1	23	1.60714	1.1	0.507143
327	30	female	unskilled workers	unskilled workers	manufacturing/blue collar industries	high-school diploma (US) / A-level (UK) or less	2	3	3	4	4	4	3	2	5	4	2	4	4	3	33	3.39286	2.3	1.09286
328	20	female	veterinary assistant	skilled workers	health and social services	bachelor/undergraduate	2	2	3	3	4	4	4	4	3	1	2	5	4	3	40	4.64286	2.6	2.04286
329	42	female	unskilled workers	unskilled workers	manufacturing/blue collar industries	high-school diploma (US) / A-level (UK) or less	1	1	3	1	1	3	3	3	4	4	3	3	4	2	38	4.28571	3.7	0.585714
330	27	female	optician	mid-level workers	commercial activities and services	bachelor/undergraduate	2	1	2	1	4	4	4	2	3	4	2	4	5	1	31	3.03571	1.7	1.33571
331	57	female	home help	unskilled workers	health and social services	high-school diploma (US) / A-level (UK) or less	3	3	4	4	3	4	3	3	4	3	3	4	5	4	40	4.64286	5.7	-1.05714
332	48	female	home help	unskilled workers	health and social services	high-school diploma (US) / A-level (UK) or less	3	3	3	3	3	3	3	3	4	4	4	3	3	3	41	4.82143	5.5	-0.678571
333	27	female	home help	unskilled workers	health and social services	high-school diploma (US) / A-level (UK) or less	1	3	3	3	2	5	3	3	4	2	1	1	3	1	33	3.39286	5.3	-1.90714
334	39	female	home help	unskilled workers	health and social services	high-school diploma (US) / A-level (UK) or less	2	2	3	4	4	4	4	2	4	4	4	4	4	3	34	3.57143	3.5	0.0714286
335	50	female	home help	unskilled workers	health and social services	high-school diploma (US) / A-level (UK) or less	3	4	5	3	3	3	2	4	3	3	4	4	3	4	50	6.42857	6.5	-0.0714286
336	37	female	home help	unskilled workers	health and social services	high-school diploma (US) / A-level (UK) or less	3	3	3	3	2	5	5	4	5	4	3	3	4	3	36	3.92857	5	-1.07143
337	40	female	home help	unskilled workers	health and social services	high-school diploma (US) / A-level (UK) or less	3	3	4	3	4	4	3	3	4	3	3	1	1	1	38	4.28571	6	-1.71429
338	53	female	home help	unskilled workers	health and social services	high-school diploma (US) / A-level (UK) or less	3	2	2	5	3	5	3	2	5	3	1	5	5	2	30	2.85714	0.9	1.95714
339	35	female	administrative agent	mid-level workers	health and social services	bachelor/undergraduate	3	3	4	3	3	4	4	3	4	4	3	4	3	4	41	4.82143	5.7	-0.878571
340	37	female	administrative agent	mid-level workers	health and social services	bachelor/undergraduate	3	1	4	5	5	5	4	3	4	3	2	3	4	1	29	2.67857	4.5	-1.82143
341	46	female	linen maid	unskilled workers	health and social services	high-school diploma (US) / A-level (UK) or less	2	2	3	4	3	3	4	3	3	3	3	3	4	2	36	3.92857	2	1.92857
342	23	female	seller / salesman	unskilled workers	commercial activities and services	high-school diploma (US) / A-level (UK) or less	1	1	3	5	5	5	5	2	5	5	1	5	5	1	21	1.25	2.2	-0.95
343	40	female	administrative agent	mid-level workers	health and social services	bachelor/undergraduate	2	2	2	4	3	3	3	3	4	3	2	3	4	2	34	3.57143	4.8	-1.22857
344	38	female	administrative agent	mid-level workers	health and social services	bachelor/undergraduate	3	1	2	3	4	4	3	3	4	4	3	4	4	2	34	3.57143	2.6	0.971429
345	50	female	administrative agent	mid-level workers	health and social services	bachelor/undergraduate	1	3	3	4	4	5	3	3	5	4	3	5	5	3	33	3.39286	0.9	2.49286
346	45	female	home help	unskilled workers	health and social services	high-school diploma (US) / A-level (UK) or less	1	2	3	3	3	4	3	2	4	3	1	2	3	1	31	3.03571	2.3	0.735714
347	32	female	home help	unskilled workers	health and social services	high-school diploma (US) / A-level (UK) or less	1	2	3	3	3	4	4	3	3	4	3	3	3	3	36	3.92857	3.1	0.828571
348	30	female	unskilled workers	unskilled workers	manufacturing/blue collar industries	high-school diploma (US) / A-level (UK) or less	3	2	5	3	4	3	3	3	2	3	4	4	3	2	44	5.35714	7.2	-1.84286
349	27	female	winemaker	skilled workers	agribusiness / food industry	high-school diploma (US) / A-level (UK) or less	5	4	5	3	2	4	3	3	4	3	3	4	2	2	47	5.89286	7	-1.10714
350	49	female	unskilled workers	unskilled workers	manufacturing/blue collar industries	high-school diploma (US) / A-level (UK) or less	3	3	4	5	3	5	3	5	4	3	5	3	4	4	42	5	4.8	0.2
351	56	female	cleaner	unskilled workers	health and social services	high-school diploma (US) / A-level (UK) or less	3	5	5	3	3	2	2	5	3	2	5	5	3	5	57	7.67857	8.2	-0.521429
352	48	female	child minder	skilled workers	health and social services	high-school diploma (US) / A-level (UK) or less	4	5	5	3	3	3	2	3	4	3	3	3	3	3	47	5.89286	4.2	1.69286
353	58	female	child minder	skilled workers	health and social services	high-school diploma (US) / A-level (UK) or less	2	3	3	5	3	5	3	3	3	3	3	4	4	1	35	3.75	2.4	1.35
354	36	female	administrative agent	mid-level workers	health and social services	bachelor/undergraduate	3	3	3	4	4	4	3	3	3	3	2	4	3	3	39	4.46429	5	-0.535714
355	51	female	administrative agent	mid-level workers	health and social services	bachelor/undergraduate	3	3	3	4	4	4	4	1	4	3	2	3	5	1	30	2.85714	1.4	1.45714
356	35	female	unskilled workers	unskilled workers	manufacturing/blue collar industries	high-school diploma (US) / A-level (UK) or less	1	3	3	3	3	4	3	3	4	3	3	4	3	3	39	4.46429	3	1.46429
357	28	female	entertainer	mid-level workers	health and social services	bachelor/undergraduate	1	1	3	5	5	5	5	2	3	4	3	1	5	1	22	1.42857	0	1.42857
358	57	female	child minder	skilled workers	health and social services	high-school diploma (US) / A-level (UK) or less	3	5	3	5	5	5	5	3	5	5	1	5	5	1	28	2.5	2.2	0.3
359	38	female	cleaner	unskilled workers	health and social services	high-school diploma (US) / A-level (UK) or less	1	2	3	4	4	5	5	1	3	3	3	3	3	1	29	2.67857	1.9	0.778571
360	37	female	child minder	skilled workers	health and social services	high-school diploma (US) / A-level (UK) or less	1	1	2	5	5	5	4	3	5	5	3	3	5	2	23	1.60714	3.7	-2.09286
361	41	female	child minder	skilled workers	health and social services	high-school diploma (US) / A-level (UK) or less	1	1	3	4	4	5	5	1	5	5	3	5	4	1	25	1.96429	1.9	0.0642857
362	24	female	child minder	skilled workers	health and social services	high-school diploma (US) / A-level (UK) or less	1	1	1	4	4	4	4	3	4	4	2	2	4	1	25	1.96429	0.2	1.76429
363	37	female	director / manager	senior executives	health and social services	master degree / postgraduate	1	1	1	3	3	4	4	2	3	5	2	2	3	2	28	2.5	0.6	1.9
364	29	female	child minder	skilled workers	health and social services	high-school diploma (US) / A-level (UK) or less	1	1	1	4	4	4	4	3	4	4	2	4	4	1	27	2.32143	2.8	-0.478571
365	42	female	foreman / technician supervisor	mid-level workers	manufacturing/blue collar industries	master degree / postgraduate	2	1	3	4	4	4	4	2	4	4	3	3	4	3	31	3.03571	4.5	-1.46429
366	52	female	child minder	skilled workers	health and social services	high-school diploma (US) / A-level (UK) or less	2	3	3	4	3	4	4	3	4	3	3	3	3	2	36	3.92857	3.8	0.128571
367	53	female	child minder	skilled workers	health and social services	high-school diploma (US) / A-level (UK) or less	3	3	3	4	3	3	4	2	3	4	3	3	4	2	36	3.92857	6.2	-2.27143
368	46	female	child minder	skilled workers	health and social services	high-school diploma (US) / A-level (UK) or less	1	3	3	4	4	4	4	3	3	2	3	4	4	2	36	3.92857	1.8	2.12857
369	50	female	child minder	skilled workers	health and social services	high-school diploma (US) / A-level (UK) or less	3	4	4	5	5	4	4	5	4	3	2	4	5	3	37	4.10714	4.6	-0.492857
370	58	female	child minder	skilled workers	health and social services	high-school diploma (US) / A-level (UK) or less	3	3	3	4	5	3	3	3	3	5	5	4	5	3	38	4.28571	4	0.285714
371	46	female	child minder	skilled workers	health and social services	high-school diploma (US) / A-level (UK) or less	1	1	3	5	4	5	4	4	5	5	2	2	5	1	23	1.60714	2.8	-1.19286
372	47	female	child minder	skilled workers	health and social services	high-school diploma (US) / A-level (UK) or less	1	1	2	4	3	5	3	2	4	3	3	2	4	2	29	2.67857	4.2	-1.52143
373	43	female	child minder	skilled workers	health and social services	high-school diploma (US) / A-level (UK) or less	1	1	2	4	4	4	4	2	4	4	1	4	4	2	27	2.32143	2.5	-0.178571
374	58	female	director / manager	senior executives	health and social services	master degree / postgraduate	1	3	3	4	4	4	3	1	4	4	3	5	4	2	33	3.39286	5	-1.60714
375	39	female	administrative agent	mid-level workers	health and social services	bachelor/undergraduate	1	3	3	4	4	4	3	4	3	3	3	3	3	2	37	4.10714	4.1	0.00714286
376	41	female	administrative agent	mid-level workers	health and social services	bachelor/undergraduate	1	1	2	2	2	1	3	1	2	5	1	2	5	1	31	3.03571	2.3	0.735714
377	41	female	unskilled workers	unskilled workers	health and social services	high-school diploma (US) / A-level (UK) or less	1	3	4	3	3	3	1	3	4	3	3	3	5	3	40	4.64286	5.4	-0.757143
378	43	female	seller / salesman	unskilled workers	agribusiness / food industry	high-school diploma (US) / A-level (UK) or less	5	5	5	2	2	1	2	5	2	1	5	2	2	5	62	8.57143	8.3	0.271429
379	28	female	educator	skilled workers	health and social services	bachelor/undergraduate	1	1	3	5	5	5	5	2	5	5	2	4	4	1	22	1.42857	0.7	0.728571
380	41	female	administrative agent	mid-level workers	health and social services	bachelor/undergraduate	2	2	3	4	4	4	4	3	4	4	3	3	4	2	32	3.21429	4.2	-0.985714
381	44	female	administrative agent	mid-level workers	health and social services	bachelor/undergraduate	2	3	2	5	5	5	4	1	4	4	1	5	5	2	26	2.14286	1	1.14286
382	36	female	administrative agent	mid-level workers	health and social services	bachelor/undergraduate	1	2	3	4	4	4	4	2	4	4	2	4	4	2	30	2.85714	1.8	1.05714
383	42	female	administrative agent	mid-level workers	health and social services	bachelor/undergraduate	1	3	3	4	4	4	3	3	4	3	3	3	3	3	36	3.92857	3	0.928571
384	35	female	child nurse	mid-level workers	health and social services	bachelor/undergraduate	3	3	4	3	3	3	3	4	3	3	3	3	3	3	44	5.35714	6.1	-0.742857
385	36	female	homecare assistant	unskilled workers	health and social services	high-school diploma (US) / A-level (UK) or less	4	3	4	3	3	3	3	3	3	3	4	3	4	3	44	5.35714	2.2	3.15714
386	44	female	home help	unskilled workers	health and social services	high-school diploma (US) / A-level (UK) or less	1	4	4	3	3	3	4	3	3	3	3	3	3	3	41	4.82143	2.7	2.12143
387	47	female	child nurse	mid-level workers	health and social services	bachelor/undergraduate	3	2	3	5	5	5	4	3	4	3	3	4	4	3	33	3.39286	2.2	1.19286
388	21	female	unskilled workers	unskilled workers	agribusiness / food industry	high-school diploma (US) / A-level (UK) or less	3	3	4	4	4	4	4	3	4	4	2	5	4	2	36	3.92857	5.7	-1.77143
389	29	female	veterinary assistant	skilled workers	health and social services	bachelor/undergraduate	2	3	5	5	5	3	3	1	4	3	4	5	3	2	38	4.28571	5	-0.714286
390	59	female	child nurse	mid-level workers	health and social services	bachelor/undergraduate	3	3	4	4	4	4	5	4	4	3	3	4	4	2	37	4.10714	6	-1.89286
391	25	female	child nurse	mid-level workers	health and social services	bachelor/undergraduate	2	2	3	5	4	4	4	3	3	4	3	3	4	2	32	3.21429	2.8	0.414286
392	52	female	child nurse	mid-level workers	health and social services	bachelor/undergraduate	4	4	4	3	3	2	2	2	4	2	3	4	3	3	47	5.89286	7.4	-1.50714
393	48	female	child nurse	mid-level workers	health and social services	bachelor/undergraduate	1	1	1	5	5	4	4	3	3	3	3	5	3	3	32	3.21429	4.4	-1.18571
394	46	female	home help	unskilled workers	health and social services	high-school diploma (US) / A-level (UK) or less	4	4	5	2	2	2	1	4	3	2	5	2	2	4	56	7.5	6.8	0.7
395	33	female	child nurse	mid-level workers	health and social services	bachelor/undergraduate	2	3	4	4	3	3	4	3	4	3	3	4	3	3	40	4.64286	7	-2.35714
396	40	female	child nurse	mid-level workers	health and social services	bachelor/undergraduate	1	1	1	5	4	4	3	2	5	3	2	3	4	2	26	2.14286	2.4	-0.257143
397	30	female	administrative agent	mid-level workers	health and social services	bachelor/undergraduate	3	3	2	5	5	5	4	2	4	4	2	3	1	2	31	3.03571	4.6	-1.56429
398	32	female	home help	unskilled workers	health and social services	high-school diploma (US) / A-level (UK) or less	1	1	4	4	3	3	4	1	4	3	3	1	5	3	30	2.85714	4	-1.14286
399	42	female	veterinarian	senior executives	health and social services	master degree / postgraduate	1	1	3	4	4	4	4	2	4	4	2	4	5	1	27	2.32143	0.8	1.52143
400	25	female	accountant	mid-level workers	manufacturing/blue collar industries	bachelor/undergraduate	2	5	5	3	3	2	3	4	3	2	4	2	3	4	49	6.25	7.8	-1.55
401	37	female	driver	unskilled workers	transport workers	high-school diploma (US) / A-level (UK) or less	1	3	3	4	4	4	4	3	4	4	3	3	1	1	34	3.57143	4.8	-1.22857
402	28	female	administrative agent	mid-level workers	health and social services	bachelor/undergraduate	1	2	3	4	4	4	3	3	4	3	3	4	4	2	34	3.57143	2.3	1.27143
403	24	female	sales representative	skilled workers	agribusiness / food industry	bachelor/undergraduate	1	2	3	5	5	5	5	1	5	5	1	1	5	1	17	0.535714	2.4	-1.86429
404	50	female	informatician	mid-level workers	commercial activities and services	master degree / postgraduate	3	2	2	4	2	4	4	2	4	4	2	2	4	2	31	3.03571	5.1	-2.06429
405	58	female	administrative agent	mid-level workers	commercial activities and services	bachelor/undergraduate	3	3	3	2	4	3	3	4	4	3	4	3	3	3	43	5.17857	7.2	-2.02143
406	26	female	engineer	senior executives	commercial activities and services	master degree / postgraduate	3	2	4	3	3	4	4	2	5	3	3	5	4	2	37	4.10714	6.4	-2.29286
407	35	female	administrative agent	mid-level workers	commercial activities and services	bachelor/undergraduate	4	2	2	4	4	4	5	2	3	4	3	3	4	2	32	3.21429	6.7	-3.48571
408	28	female	administrative agent	mid-level workers	commercial activities and services	bachelor/undergraduate	1	1	3	5	4	4	4	2	5	3	3	4	5	2	28	2.5	0.6	1.9
409	28	female	engineer	senior executives	commercial activities and services	master degree / postgraduate	3	2	2	5	5	5	5	1	4	3	2	1	4	1	23	1.60714	0.5	1.10714
410	29	female	nurse	mid-level workers	commercial activities and services	bachelor/undergraduate	4	3	3	4	4	4	3	3	5	4	2	3	5	1	32	3.21429	1	2.21429
411	32	female	administrative agent	mid-level workers	commercial activities and services	bachelor/undergraduate	3	1	2	5	5	5	5	2	5	3	2	4	4	2	26	2.14286	2.5	-0.357143
412	45	female	administrative agent	mid-level workers	commercial activities and services	bachelor/undergraduate	2	2	4	4	4	3	3	2	4	5	4	4	4	1	34	3.57143	6.7	-3.12857
413	48	female	administrative agent	mid-level workers	commercial activities and services	bachelor/undergraduate	5	3	5	4	3	3	4	3	3	3	3	5	3	3	46	5.71429	6.3	-0.585714
414	27	female	engineer	senior executives	commercial activities and services	master degree / postgraduate	2	1	2	3	3	5	4	1	3	4	2	4	5	1	28	2.5	5	-2.5
415	47	female	administrative agent	mid-level workers	commercial activities and services	bachelor/undergraduate	5	5	5	5	5	5	5	3	4	5	3	3	4	3	36	3.92857	4.7	-0.771429
416	56	female	administrative agent	mid-level workers	commercial activities and services	bachelor/undergraduate	2	3	3	4	3	4	5	3	4	5	3	5	4	3	35	3.75	1.7	2.05
417	32	female	engineer	senior executives	commercial activities and services	master degree / postgraduate	2	2	4	5	5	4	4	2	5	4	2	4	5	1	27	2.32143	5	-2.67857
418	55	female	administrative agent	mid-level workers	commercial activities and services	bachelor/undergraduate	4	2	4	5	5	4	3	3	3	4	3	3	4	2	35	3.75	6	-2.25
419	56	female	administrative agent	mid-level workers	commercial activities and services	bachelor/undergraduate	2	4	5	4	4	4	3	3	4	3	3	3	4	3	39	4.46429	6.4	-1.93571
420	36	female	senior manager	senior executives	commercial activities and services	master degree / postgraduate	5	5	5	5	5	4	4	5	4	4	3	4	3	3	43	5.17857	6.1	-0.921429
421	42	female	administrative agent	mid-level workers	commercial activities and services	bachelor/undergraduate	5	3	4	5	4	5	4	4	5	5	3	3	4	2	34	3.57143	6.9	-3.32857
422	49	female	engineer	senior executives	commercial activities and services	master degree / postgraduate	4	3	4	4	3	4	3	3	3	3	2	5	4	3	42	5	6.4	-1.4
423	61	female	administrative agent	mid-level workers	commercial activities and services	bachelor/undergraduate	3	2	2	5	5	5	5	2	4	4	2	3	5	2	25	1.96429	1.9	0.0642857
424	53	female	accountant	mid-level workers	commercial activities and services	bachelor/undergraduate	3	3	3	4	4	5	3	3	4	3	3	3	4	2	35	3.75	4.7	-0.95
425	37	female	engineer	senior executives	commercial activities and services	master degree / postgraduate	4	2	3	5	5	5	5	3	4	4	2	4	5	1	28	2.5	3.4	-0.9
426	52	female	accountant	mid-level workers	agribusiness / food industry	bachelor/undergraduate	3	5	5	3	3	3	3	4	2	2	4	3	4	4	50	6.42857	5	1.42857
427	31	female	sales representative	skilled workers	agribusiness / food industry	bachelor/undergraduate	5	4	3	4	3	4	3	4	4	3	3	4	3	3	44	5.35714	5	0.357143
428	23	female	technician	skilled workers	manufacturing/blue collar industries	bachelor/undergraduate	2	3	2	4	3	3	3	3	4	3	2	2	3	2	35	3.75	2	1.75
429	45	female	senior manager	senior executives	manufacturing/blue collar industries	master degree / postgraduate	5	4	4	4	4	4	3	2	4	4	3	5	4	3	41	4.82143	6.5	-1.67857
430	56	female	storekeeper	unskilled workers	manufacturing/blue collar industries	high-school diploma (US) / A-level (UK) or less	1	3	5	5	4	5	5	4	3	4	4	5	5	4	37	4.10714	5	-0.892857
431	43	female	unskilled workers	unskilled workers	manufacturing/blue collar industries	high-school diploma (US) / A-level (UK) or less	4	4	5	5	4	4	2	3	3	3	3	3	3	4	44	5.35714	6.5	-1.14286
432	40	female	conception of clothes	skilled workers	manufacturing/blue collar industries	high-school diploma (US) / A-level (UK) or less	1	2	2	4	4	4	4	3	4	4	2	2	4	2	28	2.5	0	2.5
433	54	female	unskilled workers	unskilled workers	manufacturing/blue collar industries	high-school diploma (US) / A-level (UK) or less	1	2	3	3	3	4	4	3	4	3	3	3	4	2	34	3.57143	5.5	-1.92857
434	50	female	cashier	unskilled workers	building industry	high-school diploma (US) / A-level (UK) or less	3	2	3	5	4	5	4	3	4	4	3	3	4	2	31	3.03571	3	0.0357143
435	40	female	secretary	skilled workers	health and social services	high-school diploma (US) / A-level (UK) or less	5	4	5	5	4	4	3	3	4	3	5	4	3	4	46	5.71429	10	-4.28571
436	54	female	cook / chef	skilled workers	health and social services	high-school diploma (US) / A-level (UK) or less	2	1	3	5	5	5	4	2	5	5	2	4	5	1	23	1.60714	1.5	0.107143
437	56	female	administrative agent	mid-level workers	manufacturing/blue collar industries	bachelor/undergraduate	1	3	2	4	4	4	4	3	4	4	3	3	4	1	30	2.85714	3.5	-0.642857
438	49	female	unskilled workers	unskilled workers	manufacturing/blue collar industries	high-school diploma (US) / A-level (UK) or less	1	3	3	5	5	5	5	5	5	5	2	5	5	3	29	2.67857	6	-3.32143
439	51	female	phone operator	unskilled workers	manufacturing/blue collar industries	high-school diploma (US) / A-level (UK) or less	3	2	2	4	4	4	4	4	4	4	3	5	4	2	35	3.75	2	1.75
440	29	female	unskilled workers	unskilled workers	manufacturing/blue collar industries	high-school diploma (US) / A-level (UK) or less	1	2	1	5	5	5	5	5	5	3	1	3	5	1	23	1.60714	1.5	0.107143
441	50	female	unskilled workers	unskilled workers	manufacturing/blue collar industries	high-school diploma (US) / A-level (UK) or less	5	3	5	5	5	4	4	3	5	3	1	4	5	3	35	3.75	8	-4.25
442	49	female	unskilled workers	unskilled workers	manufacturing/blue collar industries	high-school diploma (US) / A-level (UK) or less	2	3	3	4	4	4	3	3	4	3	3	3	4	2	35	3.75	3.5	0.25
443	28	female	unskilled workers	unskilled workers	manufacturing/blue collar industries	high-school diploma (US) / A-level (UK) or less	3	2	3	4	4	4	4	3	4	4	2	3	4	1	31	3.03571	3.5	-0.464286
444	31	female	unskilled workers	unskilled workers	manufacturing/blue collar industries	high-school diploma (US) / A-level (UK) or less	5	2	3	5	5	5	5	2	5	5	2	5	5	1	27	2.32143	1.5	0.821429
445	46	female	unskilled workers	unskilled workers	manufacturing/blue collar industries	high-school diploma (US) / A-level (UK) or less	1	1	1	5	4	4	4	1	3	3	3	2	5	3	26	2.14286	0	2.14286
446	50	female	unskilled workers	unskilled workers	manufacturing/blue collar industries	high-school diploma (US) / A-level (UK) or less	1	1	4	5	3	3	3	2	5	5	5	3	5	1	30	2.85714	5.5	-2.64286
447	49	female	unskilled workers	unskilled workers	manufacturing/blue collar industries	high-school diploma (US) / A-level (UK) or less	1	2	3	4	4	4	3	3	3	4	4	4	4	2	35	3.75	2.5	1.25
448	56	female	unskilled workers	unskilled workers	manufacturing/blue collar industries	high-school diploma (US) / A-level (UK) or less	5	4	3	3	3	4	3	5	3	3	3	3	3	3	46	5.71429	5.5	0.214286
449	57	female	unskilled workers	unskilled workers	manufacturing/blue collar industries	high-school diploma (US) / A-level (UK) or less	3	5	3	4	4	4	4	2	3	3	3	3	4	3	38	4.28571	6.5	-2.21429
450	51	female	unskilled workers	unskilled workers	manufacturing/blue collar industries	high-school diploma (US) / A-level (UK) or less	3	3	5	4	4	4	5	3	3	3	4	5	3	3	42	5	10	-5
451	31	female	storekeeper	unskilled workers	manufacturing/blue collar industries	high-school diploma (US) / A-level (UK) or less	2	3	5	3	3	2	3	5	2	1	4	4	3	4	52	6.78571	7.5	-0.714286
452	62	female	manager	skilled workers	health and social services	bachelor/undergraduate	4	4	4	3	4	4	4	4	4	4	3	4	4	2	40	4.64286	7.5	-2.85714
453	21	female	seller / salesman	unskilled workers	commercial activities and services	high-school diploma (US) / A-level (UK) or less	4	5	5	3	3	3	2	3	4	3	4	4	2	3	50	6.42857	7	-0.571429
454	32	female	seller / salesman	unskilled workers	manufacturing/blue collar industries	high-school diploma (US) / A-level (UK) or less	1	3	3	3	4	5	4	3	5	4	2	3	5	2	29	2.67857	0	2.67857
455	26	female	cloth maker	skilled workers	manufacturing/blue collar industries	bachelor/undergraduate	4	4	4	5	5	4	3	4	5	4	3	4	4	2	37	4.10714	5.5	-1.39286
456	55	female	unskilled workers	unskilled workers	manufacturing/blue collar industries	high-school diploma (US) / A-level (UK) or less	2	3	3	5	5	5	4	2	4	4	2	3	4	2	28	2.5	2	0.5
457	32	female	cloth buyer	skilled workers	manufacturing/blue collar industries	bachelor/undergraduate	4	3	4	4	4	4	3	3	3	3	3	5	4	5	44	5.35714	7.5	-2.14286
458	50	female	unskilled workers	unskilled workers	manufacturing/blue collar industries	high-school diploma (US) / A-level (UK) or less	1	3	5	3	2	3	2	3	4	3	3	3	5	2	40	4.64286	8	-3.35714
459	29	female	cook / chef	skilled workers	hospitality workers	high-school diploma (US) / A-level (UK) or less	3	4	4	3	5	5	3	1	4	4	3	2	4	1	32	3.21429	5	-1.78571
460	55	female	sales representative	skilled workers	agribusiness / food industry	bachelor/undergraduate	5	2	3	4	4	4	5	3	5	5	2	1	5	1	27	2.32143	2.5	-0.178571
461	57	female	administrative agent	mid-level workers	manufacturing/blue collar industries	bachelor/undergraduate	1	3	3	4	4	3	3	3	3	4	3	4	3	3	38	4.28571	9	-4.71429
462	48	female	handler / hand worker	unskilled workers	manufacturing/blue collar industries	high-school diploma (US) / A-level (UK) or less	5	5	5	2	1	2	1	2	2	1	5	3	4	4	58	7.85714	5	2.85714
463	44	female	unskilled workers	unskilled workers	manufacturing/blue collar industries	high-school diploma (US) / A-level (UK) or less	1	4	5	3	3	3	2	5	3	2	3	4	3	4	49	6.25	10	-3.75
464	56	female	technician	skilled workers	manufacturing/blue collar industries	bachelor/undergraduate	3	3	4	4	3	3	3	3	4	4	3	3	3	2	39	4.46429	3.5	0.964286
465	55	female	unskilled workers	unskilled workers	manufacturing/blue collar industries	high-school diploma (US) / A-level (UK) or less	4	4	4	3	3	3	3	3	3	3	4	3	3	3	46	5.71429	1	4.71429
466	28	female	sales representative	mid-level workers	manufacturing/blue collar industries	bachelor/undergraduate	5	3	5	3	3	3	3	3	3	3	3	3	3	4	47	5.89286	8.5	-2.60714
467	54	female	technician	skilled workers	manufacturing/blue collar industries	bachelor/undergraduate	1	5	5	3	3	3	3	3	2	3	3	3	3	5	47	5.89286	7.5	-1.60714
468	55	female	unskilled workers	unskilled workers	manufacturing/blue collar industries	high-school diploma (US) / A-level (UK) or less	4	3	4	3	3	4	2	3	4	2	3	3	3	3	44	5.35714	5	0.357143
469	39	female	cleaner	skilled workers	health and social services	high-school diploma (US) / A-level (UK) or less	3	4	5	5	4	4	4	3	5	4	3	3	5	3	35	3.75	7	-3.25
470	49	female	unskilled workers	unskilled workers	manufacturing/blue collar industries	high-school diploma (US) / A-level (UK) or less	3	3	3	3	3	3	3	3	3	3	3	3	3	3	42	5	9	-4
471	53	female	unskilled workers	unskilled workers	manufacturing/blue collar industries	high-school diploma (US) / A-level (UK) or less	3	3	4	4	4	5	5	3	4	4	5	5	5	1	35	3.75	5.5	-1.75
472	31	female	administrative agent	mid-level workers	health and social services	bachelor/undergraduate	3	2	1	5	5	5	5	1	5	4	1	1	5	1	18	0.714286	0	0.714286
473	31	female	administrative agent	mid-level workers	health and social services	bachelor/undergraduate	3	2	3	4	4	3	5	3	3	3	2	4	3	3	37	4.10714	1.5	2.60714
474	52	female	administrative agent	mid-level workers	health and social services	bachelor/undergraduate	3	3	4	3	3	4	4	3	3	3	3	3	4	3	40	4.64286	0	4.64286
475	55	female	seller / salesman	unskilled workers	commercial activities and services	high-school diploma (US) / A-level (UK) or less	1	1	3	3	3	3	4	2	3	3	2	3	3	3	35	3.75	2.5	1.25
476	37	female	cleaner	skilled workers	health and social services	high-school diploma (US) / A-level (UK) or less	3	2	2	3	4	5	2	5	2	4	3	4	2	5	44	5.35714	5.5	-0.142857
477	27	female	director / manager	senior executives	health and social services	master degree / postgraduate	4	3	5	3	3	3	3	5	3	3	4	3	3	3	48	6.07143	7.5	-1.42857
478	41	female	unskilled workers	unskilled workers	commercial activities and services	high-school diploma (US) / A-level (UK) or less	1	1	1	5	5	4	5	3	5	5	1	3	4	3	22	1.42857	0	1.42857
479	47	female	cook / chef	skilled workers	health and social services	high-school diploma (US) / A-level (UK) or less	2	3	3	4	3	4	4	3	4	3	2	3	4	3	35	3.75	7	-3.25
480	26	female	ergotherapist	mid-level workers	health and social services	bachelor/undergraduate	3	2	3	3	3	4	5	1	4	3	3	4	5	1	32	3.21429	5	-1.78571
481	25	female	administrative agent	mid-level workers	manufacturing/blue collar industries	bachelor/undergraduate	1	1	2	4	3	3	4	2	3	4	2	2	4	2	29	2.67857	0	2.67857
482	58	female	administrative agent	mid-level workers	manufacturing/blue collar industries	bachelor/undergraduate	3	2	4	5	5	4	3	2	3	4	2	4	4	1	32	3.21429	6	-2.78571
483	38	female	educator	skilled workers	health and social services	bachelor/undergraduate	3	2	3	4	4	4	4	4	3	4	4	2	4	2	35	3.75	3	0.75
484	35	female	educator	skilled workers	health and social services	bachelor/undergraduate	3	3	4	3	3	3	3	3	3	3	3	4	3	3	44	5.35714	6.5	-1.14286
485	35	female	accountant	mid-level workers	health and social services	bachelor/undergraduate	4	3	3	5	5	5	3	3	5	4	3	3	1	4	37	4.10714	6.5	-2.39286
486	44	female	head manager	senior executives	health and social services	master degree / postgraduate	3	2	4	4	4	4	4	2	4	4	2	1	5	1	28	2.5	4	-1.5
487	51	female	biological technician	mid-level workers	manufacturing/blue collar industries	bachelor/undergraduate	3	1	2	3	3	5	3	2	4	3	3	3	4	2	33	3.39286	3	0.392857
488	46	female	secretary	skilled workers	health and social services	high-school diploma (US) / A-level (UK) or less	3	1	3	4	3	3	3	2	3	3	2	4	4	1	35	3.75	0.5	3.25
489	46	female	administrative agent	mid-level workers	health and social services	bachelor/undergraduate	1	2	2	5	5	5	5	2	4	4	2	3	4	2	24	1.78571	0	1.78571
490	50	female	unskilled workers	unskilled workers	commercial activities and services	high-school diploma (US) / A-level (UK) or less	3	1	5	5	5	5	2	5	4	5	5	5	2	2	40	4.64286	8	-3.35714
491	37	female	administrative agent	mid-level workers	commercial activities and services	bachelor/undergraduate	3	2	3	4	4	5	4	2	3	4	3	3	4	2	32	3.21429	1.5	1.71429
492	53	female	unskilled workers	unskilled workers	commercial activities and services	high-school diploma (US) / A-level (UK) or less	1	3	3	3	3	3	3	4	3	3	3	3	2	2	41	4.82143	3	1.82143
493	52	female	unskilled workers	unskilled workers	commercial activities and services	high-school diploma (US) / A-level (UK) or less	1	3	5	3	4	5	3	1	3	3	3	3	3	2	36	3.92857	3	0.928571
494	18	female	unskilled workers	unskilled workers	agribusiness / food industry	high-school diploma (US) / A-level (UK) or less	1	1	1	4	4	4	3	1	4	4	3	3	5	1	25	1.96429	0	1.96429
495	38	female	administrative agent	mid-level workers	agribusiness / food industry	bachelor/undergraduate	1	3	3	3	3	3	3	3	3	3	4	4	4	1	39	4.46429	3	1.46429
496	21	female	unskilled workers	unskilled workers	agribusiness / food industry	high-school diploma (US) / A-level (UK) or less	3	3	3	4	3	4	3	3	3	3	3	4	3	4	42	5	5	0
497	50	female	entertainer	mid-level workers	health and social services	bachelor/undergraduate	1	3	3	3	3	2	3	3	4	3	3	3	3	3	40	4.64286	5	-0.357143
498	48	female	nurse	mid-level workers	health and social services	bachelor/undergraduate	5	4	2	4	5	5	5	2	5	5	2	4	4	2	30	2.85714	5	-2.14286
499	30	female	entertainer	mid-level workers	health and social services	bachelor/undergraduate	4	3	4	4	4	3	4	4	4	3	3	4	4	4	42	5	6.5	-1.5
500	52	female	unskilled workers	unskilled workers	commercial activities and services	high-school diploma (US) / A-level (UK) or less	5	4	4	3	3	3	2	4	3	2	3	5	2	3	52	6.78571	5	1.78571
